# Supplementary material for: TRPM7 is critical for short-term synaptic depression by regulating synaptic vesicle endocytosis
Source: eLife. 2021 Sep 27;10:e66709. doi: 10.7554/eLife.66709 (PMC8516418; doi:10.7554/eLife.66709)
Supplement: Figure 1—figure supplement 2—source data 1. [file elife-66709-fig1-figsupp2-data1.xlsx]

## Sheet: Source data
Supplementary fig.2A		WT	KO		Panel B:	over15ms_WT	over15ms_KO		over 5ms_WT	over 5ms_KO		Panel C:	over15ms_WT	over15ms_KO		Panel D:	over 5ms_WT	over 5ms_KO
	Total events number	485 (100%)	569 (100%)			2.14613	2.74819		2.14613	2.74819			140	560			140	560
	< 5ms	405 (83.51%)	480 (84.36%)			2.04139	2.97772		2.04139	2.97772			110	950			110	950
	> 5ms and < 15 ms	30 (6.19%)	14 (2.46%)			2.23045	3.58546		2.23045	3.58546			170	3850			170	3850
	>15 ms	50 (10.31%)	75 (13.18%)			2.97081	3.29885		2.97081	3.29885			935	1990			935	1990
						3.233	3.37967		3.233	3.37967			1710	2397			1710	2397
						2.68124	2		2.68124	2			480	100			480	100
						2.8202	2.47422		2.8202	2.47422			661	298			661	298
						2.45788	2.91803		2.45788	2.91803			287	828			287	828
						1.69897	2.89154		1.69897	2.89154			50	779			50	779
						1.38021	2.04139		1.38021	2.04139			24	110			24	110
						1.25527	2.13988		1.25527	2.13988			18	138			18	138
						2.16435	3.14488		2.16435	3.14488			146	1396			146	1396
						1.77085	2.85612		1.77085	2.85612			59	718			59	718
						1.6721	2.06446		1.6721	2.06446			47	116			47	116
						2.09342	3.11227		2.09342	3.11227			124	1295			124	1295
						2.02531	2.84073		2.02531	2.84073			106	693			106	693
						2.716	2.30103		2.716	2.30103			520	200			520	200
						1.81954	2.65896		1.81954	2.65896			66	456			66	456
						1.43136	3.02202		1.43136	3.02202			27	1052			27	1052
						2.6902	1.97772		2.6902	1.97772			490	95			490	95
						1.5563	2.24055		1.5563	2.24055			36	174			36	174
						1.38021	3.04493		1.38021	3.04493			24	1109			24	1109
						1.51851	2.86273		1.51851	2.86273			33	729			33	729
						2.08636	3.25066		2.08636	3.25066			122	1781			122	1781
						2.233	2.98901		2.233	2.98901			171	975			171	975
						2.14302	1.716		2.14302	1.716			139	52			139	52
						1.99564	2.5563		1.99564	2.5563			99	360			99	360
						2.45788	2.07555		2.45788	2.07555			287	119			287	119
						2.34439	2.30103		2.34439	2.30103			221	200			221	200
						1.65321	2.41497		1.65321	2.41497			45	260			45	260
						1.69897	1.5682		1.69897	1.5682			50	37			50	37
						2.83251	2.67761		2.83251	2.67761			680	476			680	476
						1.30103	2.74036		1.30103	2.74036			20	550			20	550
						2.07918	1.68124		2.07918	1.68124			120	48			120	48
						2.81291	1.79934		2.81291	1.79934			650	63			650	63
						1.25527	1.53148		1.25527	1.53148			18	34			18	34
						1.32222	2.35411		1.32222	2.35411			21	226			21	226
						1.81954	1.34242		1.81954	1.34242			66	22			66	22
						1.39794	2.26482		1.39794	2.26482			25	184			25	184
						1.30103	1.74036		1.30103	1.74036			20	55			20	55
						1.90848	2.54778		1.90848	2.54778			81	353			81	353
						1.49136	1.72428		1.49136	1.72428			31	53			31	53
						1.97313	1.66276		1.97313	1.66276			94	46			94	46
						1.63347	2.20683		1.63347	2.20683			43	161			43	161
						2	2.49416		2	2.49416			100	312			100	312
						2.32428	1.23045		2.32428	1.23045			211	17			211	17
						1.80618	2.5172		1.80618	2.5172			64	329			64	329
						1.5682	2.06446		1.5682	2.06446			37	116			37	116
						1.95424	1.81954		1.95424	1.81954			90	66			90	66
						1.39794	1.70757		1.39794	1.70757			25	51			25	51
							1.85733		1.17609	1.85733				72			15	72
							1.68124		1.11394	1.68124				48			13	48
							1.5682		1	1.5682				37			10	37
							1.95424		1	1.95424				90			10	90
							2.08636		1.04139	2.08636				122			11	122
							2.23045		1.17609	2.23045				170			15	170
							2.34044		0.778151	2.34044				219			6	219
							1.43136		0.778151	1.43136				27			6	27
							2.09342		1.14613	2.09342				124			14	124
							2.16732		0.90309	2.16732				147			8	147
							2.2014		0.778151	2.2014				159			6	159
							1.49136		1	1.49136				31			10	31
							1.5682		1.07918	1.5682				37			12	37
							1.4624		0.69897	1.4624				29			5	29
							1.88649		1.11394	1.88649				77			13	77
							1.27875		0.69897	1.27875				19			5	19
							1.50515		1	1.50515				32			10	32
							2.08636		0.69897	2.08636				122			5	122
							2.17609		1.14613	2.17609				150			14	150
							1.30103		0.90309	1.30103				20			8	20
							1.77815		1	1.77815				60			10	60
							1.43136		1	1.43136				27			10	27
							1.39794		0.954243	1.39794				25			9	25
							1.94448		1	1.94448				88			10	88
							1.38021		0.778151	1.38021				24			6	24
									0.69897	1.11394							5	13
									0.90309	1.17609							8	15
									0.90309	0.90309							8	8
									0.845098	0.954243							7	9
									0.778151	0.90309							6	8
										1.11394								13
										1.14613								14
										1.04139								11
										0.69897								5
										0.845098								7
										0.954243								9
										0.90309								8
										0.778151								6
										1.04139								11

## Sheet: Summary statistics
Panel B:		N	Mean	SEM	P values	statistical test
	over15ms_WT	50	1.971	0.0727007
	over15ms_KO	75	2.185	0.0684502	0.0379	unpaired two-tail student's t-test
		N	Mean	SEM	P values	statistical test
	over 5ms_WT	80	1.583	0.0732066
	over 5ms_KO	89	1.994	0.0748166	0.0001	unpaired two-tail student's t-test
