# Supplementary material for: TRPM7 is critical for short-term synaptic depression by regulating synaptic vesicle endocytosis
Source: eLife. 2021 Sep 27;10:e66709. doi: 10.7554/eLife.66709 (PMC8516418; doi:10.7554/eLife.66709)
Supplement: Figure 1—figure supplement 3—source data 1. [file elife-66709-fig1-figsupp3-data1.xlsx]

## Sheet: Source data
	less than 1 fF	Over 1 fF
	0.015529	0.002488
	0.028585	0.001949
	0.008113	0.000481
	0.014815	0.005019
	0.014227	0.006119
	0.006273	0.001908
	0.019023	0.027159
	0.016932	0.002571
	0.005658	0.012178
	0.000937	0.0015
	0.000956	0.006142
	0.002994	0.000452
	0.007481	0.010973
	0.006489	0.0162
	0.004102	0.004542
		0.02406

## Sheet: Summary statistics
		N	Mean	SEM	P values	statistical test
	< 1 fF	15	0.01014	0.00208122
	> 1 fF	16	0.007734	0.00214431	0.4127	unpaired two-tail student's t-test
