# Supplementary material for: TRPM7 is critical for short-term synaptic depression by regulating synaptic vesicle endocytosis
Source: eLife. 2021 Sep 27;10:e66709. doi: 10.7554/eLife.66709 (PMC8516418; doi:10.7554/eLife.66709)
Supplement: Figure 1—figure supplement 4—source data 1. [file elife-66709-fig1-figsupp4-data1.xlsx]

## Sheet: Source data
Panel C:	Exo_Gp(Im)	Exo_Gp(Im+Re)			Endo_Gp(Im)	Endo_Gp(Im+Re)
	82	79			103	161
	124	119			156	457
	86	94			96	271
	163	194			245	676
	286	281			122	219
	309	327			287	758
	303	271			135	376
	292	258			253	600
	149	129			189	348
	147	189			168	475
	137	126			173	636
	284	347			363	1042
	164	159			53	120
	597	570
	545	526

## Sheet: Summary statistics
Panel C:		N	Mean	SEM	P values	statistical test
	Exo_Gp(Im)	15	244.5	41.4675
	Exo_Gp(Im+Re)	15	244.6	39.8233	0.9928	paired student's t-test
						statistical test
	Endo_Gp(Im)	13	180.2	24.9784
	Endo_Gp(Im+Re)	13	472.2	76.4423	0.0001	paired student's t-test
