# Supplementary material for: TRPM7 is critical for short-term synaptic depression by regulating synaptic vesicle endocytosis
Source: eLife. 2021 Sep 27;10:e66709. doi: 10.7554/eLife.66709 (PMC8516418; doi:10.7554/eLife.66709)
Supplement: Figure 1—source data 1. [file elife-66709-fig1-data1.xlsx]

## Sheet: Source data
Fig. 1B	WT	KO		Fig. 1C	WT	KO		Fig. 1D	WT	KO		Fig. 1E	WT	KO			Fig. 1G	-40 mV'			-30 mV'			-20 mV'			0 mV'			20 mV'			30 mV'			40 mV'
	0	10			0.43	0.93			86	243			3.06296	1.39794				WT
	0	0			1.87	1.57			355	331			1.51851	1.93952				0.016265	-0.0776		-0.04225	-0.05551		-0.05	-0.14771		0.108333	-0.01291		0.059884	-0.0465		0.183582	0.058547		0.962407	-0.14248
	2	0			0.81	1.11			249	268			1.77815	1.34242				-0.0156	-0.15053		0.018085	-0.06053		0.091518	0.015306		0.078571	0.019748		0.543182	0.027711		0.486	0.121944		0.077953	0.305277
	15	2			0.48	0.57			79	67			1.44716	3.12189				-0.22703	0.173651		0.003285	0.006173		0.072043	-0.01715		-0.03956	0.03337		0.12284	-0.06277		0.077134	0.080311		0.259574	-0.07958
	5	24			1.09	0.33			194	38			1.51851	1.8921				0.072727	-0.03939		-0.00856	0.099333		-0.02296	-0.06007		0.014773	0.007308		0.243567	0.068698		0.136261	0.063265		0.038235	-0.02804
	3	3			0.86	0.81			179	185			2.01284	2.233				0.085976	0.158333		0.002817	0.051887		-0.02979	-0.0185		0.040217	-0.10368		0.009615	-0.01273		0.013553	0.073413		0.076316	0.014479
	9	0			0.59	1.07			108	180			2.23805	1.47712				-0.15206	-0.00023		-0.01795	-0.07267		0.051812	0.036364		-0.02087	0.089362		-0.16379	-0.02124		0.329192	0.061504		0.164062	-0.21048
	4	2			1.06	0.51			129	58			1.69897	2.02531				-0.11632	0.052532		0.056522	0.139189		0.091447	-0.12733		-0.09911	0.073596		0.296296	0.083628		0.224432	-0.10208		0.200752	0.340179
	0	0			0.74	0.91			158	279			2.233	2.23805				0.051626	-0.0539		0.050685			0.045	0.077966		0.03169	0.0055		0.162264	0.039855		0.045	-0.00065		0.0375	0.048246
	0	1			0.41	0.42			59	63			2.05308	2.77379				0.026667	0.05614		0.028906			-0.18485			0.014744	0.021181		0.571698	-0.01643			-0.10447		0.099515	0.043333
	6	3			0.8	0.77			144	92			1.27875	1.38021				0.008036	-0.05139					0.053571			0.084127	0.0332		0.284545	0.062308			-0.31455		0.677273	0.010526
	3	8			0.49	0.55			79	66			1.90309	2.68305				0.148	-0.00357					0.000926			-0.28088			0.113158	-0.09191			0.084416		0.760909	0.037931
	4	0			1.95	1.87			352	689			1.65321	2.51055				0.177778	0.153077					0.021212			-0.07838			0.310577				0.31875
	1	4			0.97	0.74			163	144			1.73239	2.33846										0.042308						0.125455				0.054808
	1	8			1.8	0.64			292	89			1.81954	1.47712
	6	3			0.62	1.17			155	231			2.36549	2.36922
	16	0			0.57	0.74			67	87			2.23045	2.20952
	1	26			0.69	1.37			118	197			1.36173	3.28713
	1	4			1.98	1.06			457	182			2.13672	1.86332
	4	4			0.49	0.8			70	235			2.51322	1.72428
	13	4			0.43	0.88			53	139			1.44716	2.73078
	12	1			0.78	1.34			206	220			1.4624	1.716
	12	0			0.75	1.25			157	151			1.57978	2.22272
	0	1			0.8	0.6			113	141			1.83251	1.96379
	29	2			0.99	0.58			216	82			1.716	2.85065
	1	1			0.68	0.7			249	113			1.99123	1.49136
	1	2			0.53	1.11			65	257			2.1271	3.19089
	10	2			1.03	1.05			215	455			1.76343	1.93952
	32	2			0.77	1.15			72	368			2.04922	1.39794
	5	1			0.78	0.88			195	146			1.93952	1.83251
	1	13			0.61	1.65			170	530			2.03342	1.32222
	17	7			0.7	0.6			63	68			1.89763	1.99123
	2	0			1.12	0.56			120	152			1.72428	2.34439
	0	2			0.48	0.7			73	133			2.11727	1.97313
	2	0			0.44	1.74			71	552			1.79934	1.63347
	3	0			1.42	0.48			293	57			2.43933	2.69197
	2	7			1.2	0.95			295	179			2.18469	1.97772
	4	1			1.2	0.95			487	143			3.12516	2.03743
	12	3			1.15	0.51			245	130			2.42975	1.86332
	0	0			0.48	1.96			147	425			1.36173	2.81291
	9	4			0.7	1.17			98	340			2.43297	3.46449
	1	6			0.52	0.64			90	98			2.58433	1.93952
	7	0			0.52	1.54			103	153			1.43136	3.11628
	0	0			1.97	0.79			241	133			1.27875	2.48855
	0	6			1.37	0.76			175	202			1.89763	2
	4	10			1.03	1.44			135	268			1.49136	2.37107
	24	10			0.9	0.69			230	136			2.65128	1.47712
	3	0			0.62	1.07			103	273			1.96848	1.96848
	8	0				1.3				196				2.26951
	2	0				0.97				98				3.03623
	3	1
	1	0
	1	21
	8	3
	0	0
	3	0
	1	0
	2	8
	8	3
	13	3
	19	3
	2	4
	9	5
	1	4
	6	2
	7	0
	2	0
	21	7
	13	8
	2	4
	1	9
	8	0
	7	0
	4	8
	1	2
	5	3
	17	9
	7	11
	12	29
	0	1
	2	12
	2	3
	0	0
		5
		10
		3
		1
		19
		21
		5
		22
		13
		6
		25
		11
		0
		14
		3
		0
		6
		0
		8
		1
		6
		4
		0
		8
		4
		8
		16

## Sheet: Summary statistics 
Fig. 1B		N	Mean	SEM	P values	statistical test		Fig. 1G	-40 mV'		N	Mean	SEM	P values	statistical test
	WT	83	5.843	0.745496						WT	12	0.006339	0.0361187
	KO	110	5.173	0.61322	0.4824	unpaired two-tail student's t-test				KO	12	0.01809	0.03102	0.7989	unpaired two-tail student's t-test
									-30 mV'		N	Mean	SEM	P values	statistical test
Fig. 1C		N	Mean	SEM	P values	statistical test				WT	9	0.01017	0.0113155
	WT	48	0.889	0.0637448						KO	7	0.01541	0.0342924	0.8651	unpaired two-tail student's t-test
	KO	50	0.959	0.0557492	0.4043	unpaired two-tail student's t-test
									-20 mV'		N	Mean	SEM	P values	statistical test
										WT	13	0.01402	0.021615
Fig. 1D		N	Mean	SEM	P values	statistical test				KO	8	-0.03014	0.0295005	0.2119	unpaired two-tail student's t-test
	WT	48	170.3	14.8695
	KO	50	201.2	19.8027	0.2123	unpaired two-tail student's t-test			0 mV'		N	Mean	SEM	P values	statistical test
										WT	12	-0.0122	0.0318986
										KO	10	0.01667	0.0174548	0.4421	unpaired two-tail student's t-test
Fig. 1E		N	Mean	SEM	P values	statistical test
	WT	48	1.944	0.063419					20 mV'		N	Mean	SEM	P values	statistical test
	KO	50	2.168	0.0806004	0.0306	unpaired two-tail student's t-test				WT	13	0.2061	0.0586121
										KO	11	0.002784	0.0182481	0.0041	unpaired two-tail student's t-test
									30 mV'		N	Mean	SEM	P values	statistical test
										WT	8	0.1869	0.0599192
										KO	13	0.0304	0.0423212	0.0326	unpaired two-tail student's t-test
									40 mV'		N	Mean	SEM	P values	statistical test
										WT	11	0.305	0.104891
										KO	11	0.03085	0.0525481	0.0236	unpaired two-tail student's t-test
