# Supplementary material for: TRPM7 is critical for short-term synaptic depression by regulating synaptic vesicle endocytosis
Source: eLife. 2021 Sep 27;10:e66709. doi: 10.7554/eLife.66709 (PMC8516418; doi:10.7554/eLife.66709)
Supplement: Figure 2—figure supplement 1—source data 1. [file elife-66709-fig2-figsupp1-data1.xlsx]

## Sheet: Source data
Panel B:	WT	KO		Panel C:	WT	KO		Panel D:	WT	KO
	105	68			11.94	8.71			5.89	3.58
	57	114			5.36	23.4			5.12	3.93
	44	91			12.47	10.94			4.82	3.94
	69	43			12.31	6.95			4.34	6.42
	97	113			11.43	23.63			4.28	5.61
	98	43			6.72	7.66			3.75	5.42
	34	49			9.81	16.53			3.82	5.25
	117	41			18.2	7.82			3.88	4.03
	55	102			20.4	13.27			3.25	4.27
	61	52			3.78	14.54			5.25	3.54
	62	60			5.65	5.76			5.11	4.43
	122	81			15.67	4.32			3.72	4.62
	80	70			21.49	3.42			4.92	5.11
	51				19.22				4.86

## Sheet: Summary statistics
Panel B:		N	Mean	SEM	P values	statistical test
	WT	14	75.14	7.78928
	KO	13	71.31	7.69053	0.7194	unpaired two-tail student's t-test
Panel C:		N	Mean	SEM	P values	statistical test
	WT	14	12.46	1.62631
	KO	13	11.3	1.92353	0.6356	unpaired two-tail student's t-test
Panel D:		N	Mean	SEM	P values	statistical test
	WT	14	4.501	0.20803
	KO	13	4.627	0.252621	0.6902	unpaired two-tail student's t-test
