# Supplementary material for: TRPM7 is critical for short-term synaptic depression by regulating synaptic vesicle endocytosis
Source: eLife. 2021 Sep 27;10:e66709. doi: 10.7554/eLife.66709 (PMC8516418; doi:10.7554/eLife.66709)
Supplement: Figure 2—source data 1. [file elife-66709-fig2-data1.xlsx]

## Sheet: Source data
Panel: B	WT	KO		Panel C:	WT	KO		Panel D:	WT	KO		Panel E:	WT	KO		Panel F:	WT	KO		Panel H:	WT	0.00207469	0.503627	KO	0.00155763	0.50331		Panel I:	WT	KO
	2.4	4.13333			32.7573	45.9651			3.765	2.939			1.735	0.984			0.227185	0.216277				0.00414938	0.507067		0.00311526	0.504369			2.19707	2.62448
	5.06667	3.8			38.1664	26.6376			5.63	3.649			3.44	1.735			0.316462	0.191461				0.00622407	0.507067		0.0046729	0.506761			1.14365	1.62115
	2.13333	3.6			36.3163	34.2773			4.799	3.1305			1.875	0.969			0.271893	0.141913				0.00829876	0.508123		0.00623053	0.540124			1.10196	1.2334
	0.533333	0.933333			24.421	25.5431			3.387	4.383			1.1	2.23			0.133237	0.167451				0.0103734	0.516391		0.00778816	0.542362			2.02607	1.23155
	4.06667	2.8			18.1692	51.0396			3.565	5.081			2.08	3.81			0.117009	0.388346				0.0124481	0.51933		0.00934579	0.548209			2.18987	3.14798
	0.8	1.46667			21.9755	24.9876			8.186	7.8925			3.96	3.705			0.315595	0.29205				0.0145228	0.521027		0.0109034	0.563414			0.88984	0.9759
	2	1.93333			34.7694	36.2623			3.38	4.2085			1.07	1.81			0.205192	0.251102				0.0165975	0.531567		0.0124611	0.563777			1.92749	4.38945
	9.26667	4.26667			21.3705	52.0157			4.677	3.296			2.21	1.37			0.130967	0.243061				0.0186722	0.545456		0.0140187	0.565311			2.34164	1.80232
	0.333333	5.26667			16.5396	37.5368			6.098	3.897			2.64	1.67			0.184399	0.274138				0.0207469	0.550479		0.0155763	0.570982			1.3669	2.30692
	1	3.86667			29.4888	22.4135			8.438	3.567			3.13	1.43			0.241805	0.108727				0.0228216	0.576388		0.017134	0.580222			5.87089	1.12745
	1.06667	0.933333			30.5969	26.307			4.047	6.222			1.2	2.985			0.202238	0.256763				0.0248963	0.579886		0.0186916	0.580293			2.7405	3.11646
	2.33333	1.53333			25.5107	43.1267			4.677	2.861			1.83	0.8335			0.249328	0.24832				0.026971	0.594244		0.0202492	0.593353			4.311	1.72665
	1.13333	3.66667			66.3049	18.3129			3.817	9.1495			2.095	5.775			0.369427	0.309442				0.0290456	0.614149		0.0218069	0.593586			1.26457	0.920622
	1	1.4			34.6195	47.0816			4.898	2.5905			2.44	0.599			0.336407	0.254743				0.0311203	0.626694		0.0233645	0.598279			1.64453	3.30638
	0.6	0.8			43.3956	21.6645			11.8405	4.8655			5.495	2.115			0.717404	0.212395				0.033195	0.627495		0.0249221	0.60003			5.16686	6.78267
	2	1.33333			50.1833	43.1669			2.869	4.509			0.849	1.885			0.259617	0.333241				0.0352697	0.631677		0.0264798	0.604129			2.95296	3.12972
	1.2	1.53333			19.5864	47.3139			2.905	2.6265			0.8035	0.9935			0.121382	0.224578				0.0373444	0.646517		0.0280374	0.614891			1.16001	3.17409
	0.8	27.2667			24.3316	29.8475			3.447	6.187			1.18	3.36			0.147506	0.272179				0.0394191	0.652039		0.029595	0.620586			0.516391	0.503795
	7.2	3.6			43.7047	20.9247			5.859	4.616			2.94	1.205			0.345388	0.225155				0.0414938	0.653913		0.0311526	0.621079			3.84347	4.44921
	22.5333	1.33333			46.3991	59.6531			4.7905	3.624			1.79	1.38			0.240923	0.421996				0.0435685	0.669839		0.0327103	0.625003			1.34941	5.86209
	12.7333	0.466667			35.3143	26.5919			4.419	3.83			2.19	1.515			0.204691	0.186584				0.0456432	0.673299		0.0342679	0.629117			4.81206	2.48342
	2.53333	2			26.6694	54.6208			7.797	2.516			6.245	0.877			0.427236	0.201868				0.0477178	0.676085		0.0358255	0.638746			6.09079	4.56062
	0.933333	2.46667			24.5542	49.7819			5.035	4.868			2.65	2.995			0.196595	0.341049				0.0497925	0.683667		0.0373832	0.651045			0.379883	3.03986
	2.6	2.66667			46.6124	39.699			7.523	3.693			2.47	1.105			0.446082	0.2125				0.0518672	0.696668		0.0389408	0.655607			2.61145	2.72156
		2.33333			29.5531	26.8552			2.861	8.282			1.16	6.35			0.144811	0.355549				0.0539419	0.697155		0.0404984	0.657248			2.11041	1.46553
		2.46667			55.4397	35.5384			4.2155	4.9115			2.625	2.91			0.346892	0.261041				0.0560166	0.702495		0.0420561	0.658642			4.68353	2.91631
		1.13333			107.08	58.1123			3.807	3.1435			2.05	1.215			0.735167	0.282312				0.0580913	0.707566		0.0436137	0.660526			2.62826	5.86628
		1.2			30.7821	27.3479			5.36	4.511			1.04	2.55			0.1982	0.208958				0.060166	0.709702		0.0451713	0.664179			1.12662	3.37515
		2.4				37.9866				3.393				1.34				0.265886				0.0622407	0.713425		0.046729	0.665558				0.990786
						16.2388				4.257				2.305				0.133437				0.0643154	0.729698		0.0482866	0.669383				4.58804
						26.6342				4.469				1.975				0.188264				0.06639	0.736453		0.0498442	0.669923				1.0489
																						0.0684647	0.769034		0.0514019	0.672902
																						0.0705394	0.776751		0.0529595	0.682788
																						0.0726141	0.792607		0.0545171	0.683397
																						0.0746888	0.798479		0.0560748	0.695193
																						0.0767635	0.807284		0.0576324	0.695731
																						0.0788382	0.807903		0.05919	0.697505
																						0.0809129	0.80975		0.0607477	0.714752
																						0.0829876	0.813355		0.0623053	0.729353
																						0.0850622	0.814196		0.0638629	0.729591
																						0.0871369	0.822225		0.0654206	0.72961
																						0.0892116	0.826774		0.0669782	0.753341
																						0.0912863	0.8295		0.0685358	0.757006
																						0.093361	0.838		0.0700935	0.758357
																						0.0954357	0.868216		0.0716511	0.760216
																						0.0975104	0.868405		0.0732087	0.760391
																						0.0995851	0.88984		0.0747664	0.762837
																						0.10166	0.891119		0.076324	0.765326
																						0.103734	0.892707		0.0778816	0.767455
																						0.105809	0.893159		0.0794393	0.767887
																						0.107884	0.897756		0.0809969	0.769676
																						0.109959	0.897756		0.0825545	0.772106
																						0.112033	0.897764		0.0841121	0.775483
																						0.114108	0.908545		0.0856698	0.778862
																						0.116183	0.925813		0.0872274	0.782076
																						0.118257	0.964515		0.088785	0.787832
																						0.120332	0.977078		0.0903427	0.790886
																						0.122407	0.989797		0.0919003	0.813131
																						0.124481	0.998165		0.0934579	0.814423
																						0.126556	0.998317		0.0950156	0.81767
																						0.128631	1.02686		0.0965732	0.819096
																						0.130705	1.02991		0.0981308	0.826223
																						0.13278	1.03358		0.0996885	0.830051
																						0.134855	1.04262		0.101246	0.83178
																						0.136929	1.04728		0.102804	0.834265
																						0.139004	1.04866		0.104361	0.834929
																						0.141079	1.05489		0.105919	0.835851
																						0.143154	1.06526		0.107477	0.842323
																						0.145228	1.06851		0.109034	0.856702
																						0.147303	1.0775		0.110592	0.858399
																						0.149378	1.09932		0.11215	0.861933
																						0.151452	1.10196		0.113707	0.869407
																						0.153527	1.10592		0.115265	0.872138
																						0.155602	1.11469		0.116822	0.876485
																						0.157676	1.12549		0.11838	0.884101
																						0.159751	1.12662		0.119938	0.90945
																						0.161826	1.13681		0.121495	0.914833
																						0.1639	1.15465		0.123053	0.918737
																						0.165975	1.19099		0.124611	0.920622
																						0.16805	1.21553		0.126168	0.934194
																						0.170124	1.22199		0.127726	0.95865
																						0.172199	1.23698		0.129283	0.971377
																						0.174274	1.25674		0.130841	0.974901
																						0.176349	1.26457		0.132399	0.9759
																						0.178423	1.268		0.133956	0.977712
																						0.180498	1.28368		0.135514	0.997661
																						0.182573	1.29307		0.137072	1.004
																						0.184647	1.32278		0.138629	1.00661
																						0.186722	1.35065		0.140187	1.01068
																						0.188797	1.36427		0.141745	1.01175
																						0.190871	1.3669		0.143302	1.01981
																						0.192946	1.37225		0.14486	1.03898
																						0.195021	1.38495		0.146417	1.04274
																						0.197095	1.38928		0.147975	1.04274
																						0.19917	1.41128		0.149533	1.04759
																						0.201245	1.42982		0.15109	1.05305
																						0.20332	1.43248		0.152648	1.06862
																						0.205394	1.43326		0.154206	1.07454
																						0.207469	1.51248		0.155763	1.07532
																						0.209544	1.51451		0.157321	1.0883
																						0.211618	1.51899		0.158879	1.08936
																						0.213693	1.51961		0.160436	1.09197
																						0.215768	1.53899		0.161994	1.10013
																						0.217842	1.54698		0.163551	1.12745
																						0.219917	1.54898		0.165109	1.15727
																						0.221992	1.55184		0.166667	1.16218
																						0.224066	1.56081		0.168224	1.16352
																						0.226141	1.56951		0.169782	1.16839
																						0.228216	1.57871		0.17134	1.17922
																						0.23029	1.59088		0.172897	1.18409
																						0.232365	1.59639		0.174455	1.18579
																						0.23444	1.6418		0.176012	1.19244
																						0.236515	1.64453		0.17757	1.20025
																						0.238589	1.65283		0.179128	1.20425
																						0.240664	1.65986		0.180685	1.2111
																						0.242739	1.67132		0.182243	1.22121
																						0.244813	1.67862		0.183801	1.22464
																						0.246888	1.758		0.185358	1.22823
																						0.248963	1.79099		0.186916	1.23155
																						0.251037	1.79254		0.188474	1.2334
																						0.253112	1.79654		0.190031	1.2335
																						0.255187	1.80107		0.191589	1.24208
																						0.257261	1.81006		0.193146	1.27419
																						0.259336	1.82983		0.194704	1.28272
																						0.261411	1.88181		0.196262	1.28441
																						0.263485	1.89923		0.197819	1.29989
																						0.26556	1.9011		0.199377	1.30474
																						0.267635	1.90721		0.200935	1.30802
																						0.26971	1.91563		0.202492	1.30815
																						0.271784	1.91713		0.20405	1.31527
																						0.273859	1.91799		0.205607	1.32451
																						0.275934	1.92078		0.207165	1.3405
																						0.278008	1.97414		0.208723	1.34065
																						0.280083	2.00125		0.21028	1.34895
																						0.282158	2.05312		0.211838	1.34903
																						0.284232	2.07899		0.213396	1.3567
																						0.286307	2.09202		0.214953	1.37217
																						0.288382	2.09244		0.216511	1.39294
																						0.290456	2.09244		0.218069	1.40714
																						0.292531	2.09699		0.219626	1.40869
																						0.294606	2.10112		0.221184	1.41465
																						0.29668	2.13005		0.222741	1.42053
																						0.298755	2.14183		0.224299	1.44059
																						0.30083	2.14721		0.225857	1.47248
																						0.302905	2.17032		0.227414	1.4773
																						0.304979	2.17983		0.228972	1.47841
																						0.307054	2.19639		0.23053	1.52171
																						0.309129	2.19707		0.232087	1.52544
																						0.311203	2.23452		0.233645	1.52966
																						0.313278	2.27117		0.235202	1.53066
																						0.315353	2.28784		0.23676	1.53557
																						0.317427	2.30006		0.238318	1.54731
																						0.319502	2.31974		0.239875	1.55464
																						0.321577	2.33846		0.241433	1.58006
																						0.323651	2.34017		0.242991	1.58535
																						0.325726	2.34164		0.244548	1.60438
																						0.327801	2.34497		0.246106	1.60798
																						0.329876	2.36675		0.247664	1.62979
																						0.33195	2.377		0.249221	1.63248
																						0.334025	2.43667		0.250779	1.63432
																						0.3361	2.56486		0.252336	1.63958
																						0.338174	2.57237		0.253894	1.64448
																						0.340249	2.59992		0.255452	1.6529
																						0.342324	2.60217		0.257009	1.65393
																						0.344398	2.60806		0.258567	1.70108
																						0.346473	2.61145		0.260125	1.70817
																						0.348548	2.62054		0.261682	1.71926
																						0.350622	2.62606		0.26324	1.72758
																						0.352697	2.62826		0.264798	1.73116
																						0.354772	2.66888		0.266355	1.74595
																						0.356846	2.70406		0.267913	1.74721
																						0.358921	2.70704		0.26947	1.75112
																						0.360996	2.74294		0.271028	1.77174
																						0.363071	2.75583		0.272586	1.77183
																						0.365145	2.76554		0.274143	1.77808
																						0.36722	2.77491		0.275701	1.79453
																						0.369295	2.78056		0.277259	1.80232
																						0.371369	2.78617		0.278816	1.82942
																						0.373444	2.78887		0.280374	1.8563
																						0.375519	2.80304		0.281931	1.86247
																						0.377593	2.84458		0.283489	1.87398
																						0.379668	2.84703		0.285047	1.90603
																						0.381743	2.85081		0.286604	1.91773
																						0.383817	2.86247		0.288162	1.9254
																						0.385892	2.92099		0.28972	1.95735
																						0.387967	2.94549		0.291277	1.98214
																						0.390041	2.98129		0.292835	1.98302
																						0.392116	2.98352		0.294393	1.98341
																						0.394191	2.98409		0.29595	2.00145
																						0.396266	3.03394		0.297508	2.00605
																						0.39834	3.03941		0.299065	2.03943
																						0.400415	3.05511		0.300623	2.04662
																						0.40249	3.07724		0.302181	2.05098
																						0.404564	3.0938		0.303738	2.06097
																						0.406639	3.12013		0.305296	2.07139
																						0.408714	3.12022		0.306854	2.07881
																						0.410788	3.1341		0.308411	2.08208
																						0.412863	3.20682		0.309969	2.09594
																						0.414938	3.20961		0.311526	2.11426
																						0.417012	3.20983		0.313084	2.11984
																						0.419087	3.21392		0.314642	2.12493
																						0.421162	3.22806		0.316199	2.13178
																						0.423237	3.22921		0.317757	2.14285
																						0.425311	3.23094		0.319315	2.14886
																						0.427386	3.24488		0.320872	2.17886
																						0.429461	3.25751		0.32243	2.18714
																						0.431535	3.29062		0.323988	2.19818
																						0.43361	3.32856		0.325545	2.20353
																						0.435685	3.37507		0.327103	2.21615
																						0.437759	3.46175		0.32866	2.22979
																						0.439834	3.46204		0.330218	2.23356
																						0.441909	3.48716		0.331776	2.24106
																						0.443983	3.55558		0.333333	2.24717
																						0.446058	3.57282		0.334891	2.28721
																						0.448133	3.57751		0.336449	2.28759
																						0.450207	3.60094		0.338006	2.30241
																						0.452282	3.6125		0.339564	2.30592
																						0.454357	3.634		0.341121	2.30692
																						0.456432	3.68991		0.342679	2.317
																						0.458506	3.80216		0.344237	2.32139
																						0.460581	3.8248		0.345794	2.3302
																						0.462656	3.83338		0.347352	2.33949
																						0.46473	3.84347		0.34891	2.35917
																						0.466805	3.88352		0.350467	2.36632
																						0.46888	3.89206		0.352025	2.37433
																						0.470954	3.89559		0.353583	2.39975
																						0.473029	3.94604		0.35514	2.42358
																						0.475104	3.96314		0.356698	2.42647
																						0.477178	4.00726		0.358255	2.43723
																						0.479253	4.01077		0.359813	2.44717
																						0.481328	4.01234		0.361371	2.44851
																						0.483402	4.02354		0.362928	2.45944
																						0.485477	4.0327		0.364486	2.46099
																						0.487552	4.04989		0.366044	2.46386
																						0.489627	4.09373		0.367601	2.48551
																						0.491701	4.09651		0.369159	2.50306
																						0.493776	4.11828		0.370717	2.52722
																						0.495851	4.12919		0.372274	2.55792
																						0.497925	4.13127		0.373832	2.57626
																						0.5	4.13446		0.375389	2.62448
																						0.502075	4.17609		0.376947	2.66117
																						0.504149	4.18381		0.378505	2.66441
																						0.506224	4.25137		0.380062	2.68735
																						0.508299	4.30449		0.38162	2.70028
																						0.510373	4.30787		0.383178	2.70422
																						0.512448	4.3611		0.384735	2.70488
																						0.514523	4.36495		0.386293	2.71655
																						0.516598	4.37856		0.38785	2.72156
																						0.518672	4.40943		0.389408	2.72741
																						0.520747	4.42737		0.390966	2.73626
																						0.522822	4.479		0.392523	2.7447
																						0.524896	4.48324		0.394081	2.754
																						0.526971	4.48908		0.395639	2.75764
																						0.529046	4.5114		0.397196	2.76183
																						0.53112	4.5463		0.398754	2.79653
																						0.533195	4.55321		0.400312	2.82399
																						0.53527	4.55788		0.401869	2.82605
																						0.537344	4.5615		0.403427	2.83877
																						0.539419	4.57535		0.404984	2.87375
																						0.541494	4.61907		0.406542	2.87951
																						0.543568	4.66044		0.4081	2.8995
																						0.545643	4.68353		0.409657	2.91579
																						0.547718	4.6895		0.411215	2.91631
																						0.549793	4.699		0.412773	2.93796
																						0.551867	4.7754		0.41433	2.93932
																						0.553942	4.85171		0.415888	2.94546
																						0.556017	4.88192		0.417445	2.96195
																						0.558091	4.90573		0.419003	2.96334
																						0.560166	4.90701		0.420561	2.98351
																						0.562241	4.95166		0.422118	2.99104
																						0.564315	4.98739		0.423676	2.99679
																						0.56639	5.00951		0.425234	3.0177
																						0.568465	5.01619		0.426791	3.04001
																						0.570539	5.02999		0.428349	3.04524
																						0.572614	5.04631		0.429907	3.06178
																						0.574689	5.07561		0.431464	3.10169
																						0.576763	5.11638		0.433022	3.10222
																						0.578838	5.15303		0.434579	3.11073
																						0.580913	5.16686		0.436137	3.11074
																						0.582988	5.16798		0.437695	3.11778
																						0.585062	5.17716		0.439252	3.11818
																						0.587137	5.19589		0.44081	3.12299
																						0.589212	5.19589		0.442368	3.12972
																						0.591286	5.19675		0.443925	3.16127
																						0.593361	5.20011		0.445483	3.16652
																						0.595436	5.2115		0.44704	3.17198
																						0.59751	5.22568		0.448598	3.19333
																						0.599585	5.22568		0.450156	3.1942
																						0.60166	5.25332		0.451713	3.23746
																						0.603734	5.26905		0.453271	3.24721
																						0.605809	5.29417		0.454829	3.25578
																						0.607884	5.35293		0.456386	3.30638
																						0.609959	5.36506		0.457944	3.37545
																						0.612033	5.38716		0.459502	3.37558
																						0.614108	5.43847		0.461059	3.3893
																						0.616183	5.44877		0.462617	3.39505
																						0.618257	5.46857		0.464174	3.39688
																						0.620332	5.5061		0.465732	3.41646
																						0.622407	5.54087		0.46729	3.43174
																						0.624481	5.58726		0.468847	3.47179
																						0.626556	5.60468		0.470405	3.47414
																						0.628631	5.60529		0.471963	3.49909
																						0.630705	5.62257		0.47352	3.4993
																						0.63278	5.659		0.475078	3.50947
																						0.634855	5.71617		0.476636	3.54344
																						0.636929	5.79962		0.478193	3.56459
																						0.639004	5.80444		0.479751	3.57481
																						0.641079	5.83698		0.481308	3.59696
																						0.643154	5.85875		0.482866	3.60743
																						0.645228	5.95265		0.484424	3.61668
																						0.647303	6.0625		0.485981	3.62383
																						0.649378	6.18085		0.487539	3.62618
																						0.651452	6.23569		0.489097	3.63375
																						0.653527	6.2757		0.490654	3.65984
																						0.655602	6.31222		0.492212	3.69629
																						0.657676	6.32897		0.493769	3.72526
																						0.659751	6.39764		0.495327	3.75344
																						0.661826	6.41947		0.496885	3.80484
																						0.6639	6.48738		0.498442	3.83772
																						0.665975	6.49443		0.5	3.85794
																						0.66805	6.53029		0.501558	3.8874
																						0.670124	6.64713		0.503115	3.89399
																						0.672199	6.65815		0.504673	3.91715
																						0.674274	6.68369		0.506231	3.92441
																						0.676349	6.69862		0.507788	3.94871
																						0.678423	6.75409		0.509346	3.9657
																						0.680498	6.75615		0.510903	3.96592
																						0.682573	6.75718		0.512461	3.96714
																						0.684647	6.80315		0.514019	3.96998
																						0.686722	6.81668		0.515576	4.00013
																						0.688797	6.97573		0.517134	4.0144
																						0.690871	6.99761		0.518692	4.02664
																						0.692946	7.03873		0.520249	4.093
																						0.695021	7.07414		0.521807	4.13059
																						0.697095	7.11089		0.523364	4.15488
																						0.69917	7.21731		0.524922	4.1659
																						0.701245	7.22587		0.52648	4.17047
																						0.70332	7.40663		0.528037	4.18699
																						0.705394	7.43246		0.529595	4.19412
																						0.707469	7.46984		0.531153	4.20134
																						0.709544	7.49464		0.53271	4.2416
																						0.711618	7.53492		0.534268	4.2596
																						0.713693	7.63854		0.535826	4.27919
																						0.715768	7.67019		0.537383	4.28437
																						0.717842	7.79727		0.538941	4.3
																						0.719917	7.81662		0.540498	4.31643
																						0.721992	7.83253		0.542056	4.34195
																						0.724066	7.84339		0.543614	4.35459
																						0.726141	7.86275		0.545171	4.37052
																						0.728216	7.87588		0.546729	4.37879
																						0.73029	7.93632		0.548287	4.38945
																						0.732365	7.9719		0.549844	4.39938
																						0.73444	8.06286		0.551402	4.41692
																						0.736515	8.10713		0.55296	4.41726
																						0.738589	8.14817		0.554517	4.44921
																						0.740664	8.15641		0.556075	4.45861
																						0.742739	8.37818		0.557632	4.47057
																						0.744813	8.38429		0.55919	4.48038
																						0.746888	8.38856		0.560748	4.50644
																						0.748963	8.41576		0.562305	4.51565
																						0.751037	8.4381		0.563863	4.5496
																						0.753112	8.55214		0.565421	4.55458
																						0.755187	8.61079		0.566978	4.56231
																						0.757261	8.74228		0.568536	4.57486
																						0.759336	8.77048		0.570093	4.58804
																						0.761411	8.82641		0.571651	4.58822
																						0.763485	8.84145		0.573209	4.59987
																						0.76556	8.86929		0.574766	4.6282
																						0.767635	8.90796		0.576324	4.65758
																						0.76971	8.98166		0.577882	4.67003
																						0.771784	9.19407		0.579439	4.68125
																						0.773859	9.21943		0.580997	4.69071
																						0.775934	9.27651		0.582555	4.69538
																						0.778008	9.31657		0.584112	4.72035
																						0.780083	9.31664		0.58567	4.77558
																						0.782158	9.36576		0.587227	4.79218
																						0.784232	9.36836		0.588785	4.79637
																						0.786307	9.55019		0.590343	4.79871
																						0.788382	10.0903		0.5919	4.80361
																						0.790456	10.2259		0.593458	4.81618
																						0.792531	10.2621		0.595016	4.81666
																						0.794606	10.2758		0.596573	4.84682
																						0.79668	10.3204		0.598131	4.86337
																						0.798755	10.462		0.599688	4.87395
																						0.80083	10.5067		0.601246	4.91338
																						0.802905	10.5771		0.602804	4.91395
																						0.804979	10.6092		0.604361	4.99085
																						0.807054	10.6958		0.605919	5.00993
																						0.809129	10.7272		0.607477	5.01153
																						0.811203	11.1458		0.609034	5.03086
																						0.813278	11.2176		0.610592	5.04232
																						0.815353	11.3384		0.61215	5.04651
																						0.817427	11.3657		0.613707	5.05779
																						0.819502	11.3786		0.615265	5.06263
																						0.821577	11.4768		0.616822	5.19166
																						0.823651	11.6177		0.61838	5.23171
																						0.825726	11.7708		0.619938	5.23384
																						0.827801	11.8327		0.621495	5.24369
																						0.829876	11.8816		0.623053	5.27738
																						0.83195	11.8937		0.624611	5.28332
																						0.834025	12.0152		0.626168	5.33471
																						0.8361	12.0787		0.627726	5.36766
																						0.838174	12.1988		0.629283	5.37431
																						0.840249	12.2069		0.630841	5.3938
																						0.842324	12.2399		0.632399	5.4166
																						0.844398	12.6133		0.633956	5.44327
																						0.846473	12.7486		0.635514	5.45318
																						0.848548	12.9337		0.637072	5.4594
																						0.850622	13.111		0.638629	5.46661
																						0.852697	13.1664		0.640187	5.48294
																						0.854772	13.4173		0.641745	5.49021
																						0.856846	13.4543		0.643302	5.50408
																						0.858921	13.4554		0.64486	5.52143
																						0.860996	13.4722		0.646417	5.53718
																						0.863071	13.4804		0.647975	5.54563
																						0.865145	13.6098		0.649533	5.58335
																						0.86722	13.9996		0.65109	5.61154
																						0.869295	14.1607		0.652648	5.66705
																						0.871369	14.215		0.654206	5.69237
																						0.873444	14.3154		0.655763	5.69563
																						0.875519	14.4205		0.657321	5.73272
																						0.877593	14.4821		0.658879	5.74168
																						0.879668	14.5677		0.660436	5.75945
																						0.881743	14.7312		0.661994	5.79047
																						0.883817	14.8708		0.663551	5.79629
																						0.885892	14.9442		0.665109	5.82994
																						0.887967	15.1722		0.666667	5.84124
																						0.890041	15.5502		0.668224	5.86628
																						0.892116	15.5655		0.669782	5.88113
																						0.894191	15.7302		0.67134	5.90124
																						0.896266	15.8984		0.672897	5.90794
																						0.89834	16.1068		0.674455	5.95199
																						0.900415	16.111		0.676012	5.96091
																						0.90249	16.3851		0.67757	5.97789
																						0.904564	16.7614		0.679128	5.99807
																						0.906639	16.7909		0.680685	6.0389
																						0.908714	16.8002		0.682243	6.04342
																						0.910788	17.1749		0.683801	6.04607
																						0.912863	17.2289		0.685358	6.07974
																						0.914938	17.3419		0.686916	6.12339
																						0.917012	17.3954		0.688474	6.14729
																						0.919087	17.5021		0.690031	6.17122
																						0.921162	17.6376		0.691589	6.20302
																						0.923237	17.7202		0.693146	6.20552
																						0.925311	17.8694		0.694704	6.25603
																						0.927386	18.0883		0.696262	6.27775
																						0.929461	18.8075		0.697819	6.31474
																						0.931535	18.9703		0.699377	6.34423
																						0.93361	19.2267		0.700935	6.39475
																						0.935685	19.2497		0.702492	6.40021
																						0.937759	19.9368		0.70405	6.40096
																						0.939834	20.9312		0.705607	6.48613
																						0.941909	21.3226		0.707165	6.49247
																						0.943983	21.775		0.708723	6.53347
																						0.946058	21.9726		0.71028	6.55622
																						0.948133	22.0938		0.711838	6.56076
																						0.950207	22.2496		0.713396	6.62305
																						0.952282	23.1729		0.714953	6.63138
																						0.954357	23.693		0.716511	6.65458
																						0.956432	24.069		0.718069	6.71322
																						0.958506	25.2138		0.719626	6.7154
																						0.960581	25.3236		0.721184	6.74891
																						0.962656	25.376		0.722741	6.76871
																						0.96473	26.1079		0.724299	6.7709
																						0.966805	26.6392		0.725857	6.78267
																						0.96888	27.2118		0.727414	6.79841
																						0.970954	27.51		0.728972	6.81344
																						0.973029	28.4546		0.73053	6.87458
																						0.975104	28.9039		0.732087	6.87822
																						0.977178	31.6067		0.733645	6.91562
																						0.979253	32.2167		0.735202	6.92643
																						0.981328	32.4968		0.73676	6.98635
																						0.983402	36.3563		0.738318	7.08404
																						0.985477	38.9998		0.739875	7.10783
																						0.987552	43.6395		0.741433	7.11191
																						0.989627	50.0865		0.742991	7.14174
																						0.991701	53.3976		0.744548	7.21743
																						0.993776	55.063		0.746106	7.24511
																						0.995851	79.072		0.747664	7.31009
																						0.997925	81.597		0.749221	7.35866
																						1	112.218		0.750779	7.36108
																									0.752336	7.41216
																									0.753894	7.50039
																									0.755452	7.56651
																									0.757009	7.56704
																									0.758567	7.58616
																									0.760125	7.59779
																									0.761682	7.62662
																									0.76324	7.71131
																									0.764798	7.73181
																									0.766355	7.7434
																									0.767913	7.75254
																									0.76947	7.76513
																									0.771028	7.81274
																									0.772586	7.82673
																									0.774143	7.84657
																									0.775701	7.90677
																									0.777259	7.91407
																									0.778816	7.99961
																									0.780374	8.02601
																									0.781931	8.02904
																									0.783489	8.11797
																									0.785047	8.16318
																									0.786604	8.19539
																									0.788162	8.23097
																									0.78972	8.31936
																									0.791277	8.37004
																									0.792835	8.50445
																									0.794393	8.51665
																									0.79595	8.51965
																									0.797508	8.53255
																									0.799065	8.54406
																									0.800623	8.58419
																									0.802181	8.59445
																									0.803738	8.61079
																									0.805296	8.74244
																									0.806854	8.80414
																									0.808411	8.85256
																									0.809969	8.85763
																									0.811526	8.94433
																									0.813084	8.98439
																									0.814642	9.04048
																									0.816199	9.11908
																									0.817757	9.11909
																									0.819315	9.12269
																									0.820872	9.16726
																									0.82243	9.20365
																									0.823988	9.40844
																									0.825545	9.47421
																									0.827103	9.54187
																									0.82866	9.60512
																									0.830218	9.67436
																									0.831776	9.68281
																									0.833333	9.69831
																									0.834891	9.75734
																									0.836449	9.85838
																									0.838006	9.93043
																									0.839564	9.99236
																									0.841121	10.1621
																									0.842679	10.31
																									0.844237	10.5017
																									0.845794	10.649
																									0.847352	10.7503
																									0.84891	10.9308
																									0.850467	11.0578
																									0.852025	11.116
																									0.853583	11.1358
																									0.85514	11.1591
																									0.856698	11.1596
																									0.858255	11.3421
																									0.859813	11.3475
																									0.861371	11.4637
																									0.862928	11.4789
																									0.864486	11.6821
																									0.866044	11.6994
																									0.867601	11.9537
																									0.869159	12.0629
																									0.870717	12.0766
																									0.872274	12.1111
																									0.873832	12.2718
																									0.875389	12.3954
																									0.876947	12.4104
																									0.878505	12.4459
																									0.880062	12.6179
																									0.88162	12.6263
																									0.883178	12.7033
																									0.884735	12.7287
																									0.886293	12.9619
																									0.88785	12.9667
																									0.889408	13.0488
																									0.890966	13.1012
																									0.892523	13.1103
																									0.894081	13.1606
																									0.895639	13.4551
																									0.897196	13.6085
																									0.898754	13.7538
																									0.900312	13.7599
																									0.901869	13.8294
																									0.903427	13.8867
																									0.904984	14.034
																									0.906542	14.04
																									0.9081	14.1202
																									0.909657	14.1279
																									0.911215	14.181
																									0.912773	14.2187
																									0.91433	14.2718
																									0.915888	14.288
																									0.917445	14.8262
																									0.919003	14.9241
																									0.920561	15.0364
																									0.922118	15.2069
																									0.923676	15.3639
																									0.925234	15.4537
																									0.926791	15.7646
																									0.928349	15.8269
																									0.929907	15.9166
																									0.931464	16.0428
																									0.933022	16.1707
																									0.934579	16.4957
																									0.936137	17.0593
																									0.937695	17.3919
																									0.939252	17.7703
																									0.94081	17.8145
																									0.942368	18.3926
																									0.943925	18.5577
																									0.945483	18.5774
																									0.94704	18.5784
																									0.948598	19.1117
																									0.950156	19.4237
																									0.951713	19.6186
																									0.953271	19.6468
																									0.954829	19.7123
																									0.956386	19.9196
																									0.957944	20.9195
																									0.959502	21.0491
																									0.961059	21.2082
																									0.962617	21.4715
																									0.964174	21.5204
																									0.965732	22.9605
																									0.96729	23.3465
																									0.968847	24.7256
																									0.970405	25.0178
																									0.971963	26.7635
																									0.97352	27.7285
																									0.975078	27.7431
																									0.976636	28.379
																									0.978193	28.7991
																									0.979751	30.2825
																									0.981308	30.6001
																									0.982866	30.8046
																									0.984424	31.1486
																									0.985981	32.4443
																									0.987539	33.7667
																									0.989097	35.0638
																									0.990654	40.6497
																									0.992212	45.5518
																									0.993769	47.7027
																									0.995327	58.6316
																									0.996885	59.0798
																									0.998442	62.9214
																									1	78.5703

## Sheet: Summary statistics
Panel B:		N	Mean	SEM	P values	statistical test
	WT	24	3.594	1.05199
	KO	29	3.193	0.905854	0.7682	unpaired two-tail student's t-test
Panel C:		N	Mean	SEM	P values	statistical test
	WT	28	36.24	3.5171
	KO	31	35.92	2.27269	0.9376	unpaired two-tail student's t-test
Panel D:		N	Mean	SEM	P values	statistical test
	WT	28	5.075	0.397146
	KO	31	4.425	0.298973	0.1835	unpaired two-tail student's t-test
Panel E:		N	Mean	SEM	P values	statistical test
	WT	28	2.296	0.248783
	KO	31	2.128	0.248759	0.6304	unpaired two-tail student's t-test
Panel F:		N	Mean	SEM	P values	statistical test
	WT	28	0.2798	0.0298347
	KO	31	0.2474	0.0131368	0.3012	unpaired two-tail student's t-test
Panel I:		N	Mean	SEM	P values	statistical test
	WT	28	2.516	0.312372
	KO	31	2.79	0.296629	0.5202	unpaired two-tail student's t-test
