# Supplementary material for: TRPM7 is critical for short-term synaptic depression by regulating synaptic vesicle endocytosis
Source: eLife. 2021 Sep 27;10:e66709. doi: 10.7554/eLife.66709 (PMC8516418; doi:10.7554/eLife.66709)
Supplement: Figure 3—figure supplement 1—source data 1. [file elife-66709-fig3-figsupp1-data1.xlsx]

## Sheet: Source data
Panel B:	WT	KO
	15.5023	64.3075
	18.932	13.7277
	13.6696	31.626
	17.4524	23.6443
	17.5368	13.0337
	17.6488	20.6709
	14.1419	23.1452
	11.2899	18.0382
	17.209	28.4256
	17.2268	13.9882
	14.9766	16.5739
	13.8856	25.2128
	15.8291	24.5853
	13.1104	19.0825
	13.1875	11.3675
	17.7719	13.3861
	21.01	12.1697
	17.5667	17.6577
	12.0857	43.4504
	15.072	10.4954
	19.3563	13.9198
	15.1651	36.4829
	20.4603	13.5309
	31.6041	12.5761
	21.5403	11.9771
	11.8501	15.2325
	17.7341	19.2518
	16.0495	9.80806
	17.3947	20.0643
	17.2396	13.7866
	23.2812	26.803
	21.4589	11.7385
	17.9045	21.1441
	13.133	46.9507
	16.3882	18.6677
	13.4278	20.6803
	17.9979	18.6155
	16.8156	14.0812
	15.3965	28.2294
	16.0896	19.6587
	21.5131	9.54135
	18.9516	16.1812
	22.1178	34.4474
	19.6279	14.5193
	17.715	27.055
	15.903	24.2509
	16.9916	9.13902
	14.7434	38.9946
	15.3819	25.8936
	20.2621	50.2045
	21.535	28.4608
	17.4502	23.2306
	14.5717	82.7964
	13.7854	19.3801
	10.2891	16.6955
	7.61527	16.9264
	19.5474	30.9367
	17.365	21.2922
	18.6305	16.8829
	30.8766	16.784
	17.7185	18.7153
	13.3619	18.939
	11.2926	20.887
	20.6571	18.675
	17.7405	20.2148
	20.0708	18.7385
	21.8962	19.8886
	12.8833	10.6921
	20.1657	24.9002
	25.7701	20.2172
	12.8681	17.7872
	9.94167	23.3495
	31.5029	9.99626
	17.8229	27.414
	19.69	60.1128
	11.8169	32.3993
	24.2594	20.6091
	10.6324	23.9015
	22.235	19.3538
	21.3799	20.1103
	11.9313	28.8128
	16.1479	37.1521
	19.8629	60.7911
	22.8577	30.8729
	15.8705	88.1548
	19.0983	62.7203
	26.1917	23.4294
	15.0534	17.3891
	19.3693	79.3841
	23.1941	45.8654
	9.77233	10.5959
	20.8987	35.4603
	12.8695	16.9599
	20.0709	24.0241
	25.7829	9.16575
	14.1735	20.0252
	19.7658	25.5561
	20.5932	26.8018
	14.9205	24.5789
	10.6417	20.0887
	33.8655	15.3587
	15.9753	38.4857
	17.8359	20.3348
	17.3246	19.6305
	11.2106	18.3946
	18.5452	25.0877
	16.8389	9.38025
	19.8564	40.3
	27.217	29.694
	9.12047	20.6952
	9.46067	29.1035
	20.5992	40.7722
	18.1161	23.1844
	16.6159	28.0475
	29.2671	13.1378
	16.7284	14.6592
	27.7615	67.1894
	19.7394	24.9483
	25.2816	30.7159
	23.3487	54.2047
	28.4041	25.722
	20.2722	50.9129
	14.6683	19.0231
	21.2285	21.4633
	14.0959	35.8513
	18.8241	38.9475
	17.572	36.2133
	19.5862	17.3584
	18.304	28.7863
	22.0832	27.1229
	13.4215	18.8239
	9.95602	19.9924
	19.4122	30.6328
	18.6363	31.9854
	11.9955
	13.6306
	10.8091
	17.3434
	20.7284
	16.6129
	25.9717
	18.4818
	13.9726
	21.4281
	15.3944
	24.0509
	14.3864
	18.0949
	25.1723
	9.77466
	21.9202
	19.4585
	17.6431
	16.6112
	24.1642
	16.9053
	23.565
	10.4558
	15.0447
	20.2767
	23.5962

## Sheet: Summary statistics
Panel B:		N	Mean	SEM	P values	statistical test
	WT	161	17.96	0.383415
	KO	134	25.84	1.28509	<0.0001	unpaired two-tail student's t-test
