# Supplementary material for: TRPM7 is critical for short-term synaptic depression by regulating synaptic vesicle endocytosis
Source: eLife. 2021 Sep 27;10:e66709. doi: 10.7554/eLife.66709 (PMC8516418; doi:10.7554/eLife.66709)
Supplement: Figure 3—figure supplement 3—source data 1. [file elife-66709-fig3-figsupp3-data1.xlsx]

## Sheet: Source data
Panel E:	WT_Clathrin	KO_Clathrin		WT_Dynamin-1	KO_Dynamin-1		WT_AP2	KO_AP2		WT_Synaptotagmin-1	KO_Synaptotagmin-1
	0.929117	1.18013		1.10382	1.1389		0.98873	1.01537		0.635519	0.654117
	1.08541	1.05831		1.17883	1.0462		1.20505	1.08599		0.733099	0.522945
	0.642203	0.897707		1.08913	1.0212		1.02033	1.10921		0.706446	0.630839
	0.905794	1.16142		1.10983	1.24963		1.16184	1.42982		0.647128	1.09575
	0.95749	0.694789		1.12957	1.01169		1.27679	1.0692		1.18529	0.426068
	0.683139	0.811611		1.21113	1.27086		1.07979	1.86487		0.506339	0.637824
	0.656509	0.640462		1.38273	1.18092		1.65722	1.17839		0.750139	0.846865
	0.980793	1.24198		1.28635	1.34602		1.05661	1.33648		1.03451	1.25434
	1.38623	0.854929		1.23618	1.09796		1.17048	1.1316		0.778324	0.43554
	0.805584	0.778885		1.15669	1.29706		1.08968	1.50714		0.538221	1.36766
	0.668226	0.875621		1.21283	1.38905		1.18395	1.12912		1.01658	0.82745
	0.831051	0.77307		1.27062	1.25187		1.24715	1.39279		0.636207	0.602421
	0.881165	1.34066			1.25969			1.33722		0.840941	0.539058
		0.666978			1.27337			1.23371		0.741324	0.646102
		1.3961
		0.67706

## Sheet: Summary statistics
Panel E:		N	Mean	SEM	P values	statistical test
	WT_Clathrin	13	0.8779	0.0598422
	KO_Clathrin	16	0.9406	0.0652322	0.4783	unpaired two-tail student's t-test
		N	Mean	SEM	P values	statistical test
	WT_Dynamin-1	12	1.197	0.0263956
	KO_Dynamin-1	14	1.202	0.0336283	0.9038	unpaired two-tail student's t-test
		N	Mean	SEM	P values	statistical test
	WT_AP2	12	1.178	0.0528639
	KO_AP2	14	1.273	0.0631107	0.252	unpaired two-tail student's t-test
		N	Mean	SEM	P values	statistical test
	WT_Synaptotagmin-1	14	0.7679	0.0538029
	KO_Synaptotagmin-1	14	0.7491	0.0821025	0.8441	unpaired two-tail student's t-test
