# Supplementary material for: TRPM7 is critical for short-term synaptic depression by regulating synaptic vesicle endocytosis
Source: eLife. 2021 Sep 27;10:e66709. doi: 10.7554/eLife.66709 (PMC8516418; doi:10.7554/eLife.66709)
Supplement: Figure 3—figure supplement 4—source data 1. [file elife-66709-fig3-figsupp4-data1.xlsx]

## Sheet: Source data
Panel B:	WT	KO		Panel D:	WT	KO		Panel F:	WT	KO		Panel H:	WT	KO
	0.481782	0.429292			0.539491	0.618448			0.513836	0.229467			0.274084	0.444664
	0.492674	0.470469			0.717524	0.557746			0.594706	0.141449			0.43497	0.533385
	0.348156	0.54014			0.651872	0.460316			0.728073	0.383397			0.403854	0.320507
	0.550642	0.609614			0.67953	0.628582			0.770677	0.430063			0.400768	0.427561
	0.49454	0.547209			0.817203	0.704864			0.654954	0.234605			0.365089	0.362555
	0.463581	0.5355			0.634605	0.896703			0.798287	0.300158			0.497966	0.534293
	0.38381	0.553302			0.7678	0.844021			0.524003	0.27528			0.323109	0.348604
	0.665203	0.46593			0.598656	0.701883			0.387541	0.244896			0.476517	0.351951
	0.391457	0.317557			0.592456	0.527365			0.630598	0.405786			0.381194	0.421089
	0.700811	0.44801			0.610904	0.672936			0.630773	0.294782			0.229826	0.402124
	0.571294	0.322312			0.564364	0.707313			0.527783	0.262611			0.278079	0.986415
	0.727323	0.347215			0.502466	0.796042			0.895365	0.262584			0.403626	0.749096
	0.588578	0.827706			0.478261	0.751246			0.946913	0.415452			0.717396	0.39191
	0.371962	0.688376			0.46884	0.300099			0.635445	0.309693			0.378335	0.59711
	0.46375	0.55354			0.472426	0.431523			0.570181	0.370552			0.565436	0.519717
	0.520621	0.370968			0.522886	0.547036			0.559506	0.308175			0.405688	0.510521
	0.536525	0.415473			0.539072	0.733133			0.497139	0.341709			0.406098	0.673879
	0.448904	0.442852			0.316874	0.395524			0.350215	0.462794			0.337383	0.538647
	0.339082	0.336206			0.502331	0.723168			0.295225	0.302702			0.453525	0.62949
	0.416472	0.419442			0.388211	0.801309			0.431331	0.32594			0.446632	0.830889
	0.534029	0.439665			0.561412	0.367052			0.353542	0.627354			0.272172	0.545831
	0.759628	0.721121			0.738189	0.572304			0.316288	0.717612			0.297714	0.399354
	0.695963	0.40497			0.677384	0.419433			0.3499	0.638221			0.356885	0.804709
	0.941983	0.868899			0.788383	0.675115			0.3986	0.492927			0.162326	0.523061
	0.735114	0.766623			0.417842	0.793636			0.318317	0.522523			0.359471	0.321844
	0.741313	0.540095			0.602721	0.326945			0.342617	0.542759			0.334253	0.785842
	0.75344	0.679596			0.720095	0.371056			0.625652	0.362663			0.489876	0.39294
	0.839126	0.337074			0.8195	0.501163			0.640538	0.52751			0.493546	0.337304
	0.548379	0.421871			0.597017	0.571921			0.628182	0.522835			0.468687	0.382626
	0.611746	0.530544			0.750964	0.373442			0.606549	0.374314			0.334685	0.881398
	0.403737	1.64466			0.57177	0.375341			0.818208	0.560355			0.618563	0.520216
	0.504176	0.431392			0.673889	0.33091			0.683888	0.529479			0.511252	0.407568
	0.369181	0.353197			0.495522	0.436272			0.435724	0.600707			0.416323	0.803726
	0.352667	0.707366			0.492287	0.421629			0.650824	0.658339			0.372526	0.248695
	0.435347	0.527665			0.496708	0.49257			0.421915	0.589307			0.483884	0.348949
	0.666367	0.568898			0.458615	0.32751			0.258249	0.572795			0.237788	0.348066
	0.45522	0.558307			0.513104	0.33673			0.422953	0.505586			0.294571	0.360395
	0.390078	0.608397			1.08033	0.614283			0.515334	0.387752			0.460575	0.434197
	0.623383	0.447932			0.816158	0.359986			0.375559	0.565071			0.444513	0.407013
	0.564772	0.475131			0.832939	0.519218			0.778659	0.683731			0.385362	0.380734
	0.766832	0.580984			0.613805	0.379618			0.265498	0.385892			0.311269	0.611364
	0.866555	0.648308			0.447454	0.673348			0.206835	0.336007			0.403502	0.757697
	0.747878	0.451636			0.640906	0.635868			0.308875	0.412799			0.321582	0.582745
	0.448136	0.393896			0.415553	0.41931			0.600595	0.302371			0.430615	0.619466
	0.944902	0.325133			0.395984	0.485373			0.365483	0.481774			0.417218	0.363092
	1.26417	0.417032			0.63233	0.423282			0.360432	0.65			0.39501	0.374679
	1.00983	0.32413			0.63465	0.609827			0.597387	0.479364			0.444789	0.362234
	0.455111	0.606808			0.535766	0.480923			0.459561	0.812317			0.400025	0.466134
	0.437481	0.60566			0.524632	0.37768			0.361181	0.455213			0.296371	0.478901
	0.762802	0.564111			0.843475	0.573078			0.821546	0.452275			0.74355	0.363835
	0.424435	0.83166			0.611676	0.593069			0.722896	0.649227			0.280308	0.372823
	0.596929	0.499669			0.85064	0.453842			0.605367	0.719126			0.876346	0.442277
	0.357817	0.347379			0.565469	0.43589			0.715265	0.51606			0.822425	0.461963
	1.27297	0.465452			0.446837	0.613227			0.539926	0.711873			0.651151	0.392318
	0.668987	0.42224			0.537522	0.369618			0.360264	0.479228			0.777414	0.39515
	0.319215	0.413182			0.701158	0.611249			0.390666	0.594762			0.798274	0.486503
	0.413378	0.524203			0.283598	0.477516			0.334215	0.732125			0.653959	0.55157
	0.552702	0.484394			0.320973	0.671866			0.378795	0.40152			0.543884	0.542285
	0.345631	0.551988			0.76186	0.509374			0.509838	0.501085			0.555992	0.493383
	0.415316	0.849438			0.530514	0.651122			0.594355	0.686489			0.998407	0.67494
	0.391501	0.571818			0.564603	0.669754			0.613344	0.432898			0.536008	0.628562
	0.418207	0.527751			0.63767	0.655432			0.666929	0.953939			0.561466	0.62393
	0.556979	0.543443			0.805732	0.728923			0.659188	0.705795			0.381958	0.740451
	0.688424	0.403783			0.920946	0.637731			1.06828	0.783748			0.574641	0.720474
	0.454096	0.403986			1.1322	0.650716			0.833686	0.645151			0.809815	1.00167
	0.268352	0.514493			0.737296	0.511223			0.574309	0.835838			0.652433	0.670246
	0.389004	0.544715			0.486679	0.594391			0.784455	0.724252			0.573144	0.344923
	0.382434	1.00922			0.414332	0.828273			0.888247	0.589157			1.05442	0.408035
	0.260508	0.424385			0.49815	0.565971			0.797023	0.588032			0.421743	0.553826
	0.434918	0.968018			0.511967	0.562701			0.900104	0.655447			0.783591	0.597123
	0.62361	0.787817			0.653136	0.57745			0.796224	0.844645			1.06288	0.505849
	0.350435	0.614409			0.630854	0.708182			0.48875	0.717148			0.726249	1.11591
	0.390085	0.467617			0.573124	0.620757			0.400618	0.600376			0.706393	0.758431
	0.286959	0.6706			0.722189	0.495609			0.763849	0.589328			0.720013	0.822618
	0.391758	0.426629			0.861119	0.598			1.04546	0.776629			1.33377	0.409359
	0.230463	0.896615			0.367374	0.473613			0.404343	0.499663			0.796887	0.594092
	0.433839	0.676668			0.275719	0.426658			0.491576	0.60129			0.741935	0.83178
	0.479344	0.702361			0.385428	0.76454			0.488042	0.669403			0.606958	0.622896
	0.375659	0.323793			0.546577	0.518652			0.593844	0.850947			0.505935	0.433608
	0.532721	0.575827			0.370306	0.612483			0.499679	0.574363			0.565918	0.580166
	0.820962	0.57295			0.437488	1.32404			1.08769	0.89743			0.785904	0.561323
	0.278762	0.625195			0.602683	0.487223			0.8717	0.481825			0.81058	0.463211
	0.401899	0.580526			0.509559	0.642707			0.531889	1.05857			0.47511	0.60494
	0.456413	0.640991			0.810663	0.797898			0.527347	0.742946			0.856152	0.493391
	0.779595	0.808011			0.617107	0.492948			0.309567	0.389888			0.684781	0.30528
	0.382842	0.555698			0.572034	0.757819			0.589016	0.974288			0.664561	0.535667
	0.339702	0.681541			0.477289	0.591914			0.37706	0.612387			0.662166	0.544805
	0.499039	0.422166			0.625919	0.59929			0.50294	1.16861			0.605874	0.503099
	0.978579	0.357341			0.534773	0.879698			0.771175	1.23809			0.684899	0.589543
	0.401214	0.589805			0.262209	0.609646			0.408025	0.781321			0.603058	0.569117
	0.472654	0.594248			0.602669	0.812071			0.390765	1.07993			0.692025	0.553615
	0.426133	0.272936			0.608104	0.829949			0.577954	1.62907			0.678432	0.563151
	0.427158	0.477264			0.454087	0.682632			0.911581	0.678259			1.32102	0.62612
	0.253513	0.711813			0.746741	0.882137			0.436647	0.612361			0.628629	0.559462
	0.516455	0.330805			0.427124	0.742784			0.590767	0.72954			0.80502	0.64963
	0.369754	0.373826			0.531698	0.750629			0.730545	0.442625			1.18434	0.634555
	0.579876	0.433716			0.475393	0.755451			0.215039	0.640516			0.964982	0.627462
	1.01097	0.350783			0.657206	0.529989			0.263097	0.501177			0.803522	0.490509
	0.3123	0.661271			0.475686	0.627777			0.538116	0.690922			0.667353	1.15317
	0.349302	0.475835			0.412354	0.450739			0.421043	0.390194			1.02308	0.640978

## Sheet: Summary statistics
Panel B:		N	Mean	SEM	P values	statistical test
clathrin	WT	100	0.5335	0.020968
	KO	100	0.5455	0.0191495	0.6709	unpaired two-tail student's t-test
Panel D:		N	Mean	SEM	P values	statistical test
dynamin-1	WT	100	0.587	0.016215
	KO	100	0.5888	0.0166446	0.9388	unpaired two-tail student's t-test
Panel F:		N	Mean	SEM	P values	statistical test
AP2	WT	100	0.5619	0.0200564
	KO	100	0.5742	0.023746	0.6916	unpaired two-tail student's t-test
Panel H:		N	Mean	SEM	P values	statistical test
synaptotagmin-1	WT	100	0.5681	0.0239105
	KO	100	0.5464	0.017722	0.4627	unpaired two-tail student's t-test
