# Supplementary material for: TRPM7 is critical for short-term synaptic depression by regulating synaptic vesicle endocytosis
Source: eLife. 2021 Sep 27;10:e66709. doi: 10.7554/eLife.66709 (PMC8516418; doi:10.7554/eLife.66709)
Supplement: Figure 3—figure supplement 5—source data 1. [file elife-66709-fig3-figsupp5-data1.xlsx]

## Sheet: Source data
Panel B:	WT	KO		Panel C:	20ms_WT	20ms_KO		50ms_WT	50ms_KO		100ms_WT	100ms_KO		150ms_WT	150ms_KO		200ms_WT	200ms_KO		300ms_WT	300ms_KO		400ms_WT	400ms_KO		500ms_WT	500ms_KO		750ms_WT	750ms_KO		1000ms_WT	1000ms_KO		1500ms_WT	1500ms_KO		2000ms_WT	2000ms_KO
	0.812988	1.34277			0.274597	0.198673		0.450044	0.171913		0.685424	0.317547		0.527864	0.233931		0.561277	0.256853		0.913977	0.446435		0.965778	0.489971		0.756783	0.497645		1.02381	0.628774		0.941543	0.720106		0.820565	0.747169		0.778864	0.756756
	3.15612	1.12732			0.28763	0.462964		0.480441	0.310714		0.580867	0.654116		0.751022	0.746683		0.738037	0.70487		0.746037	0.484632		0.826876	0.606895		0.758728	0.850898		0.91119	0.673237		0.788812	1.0593		0.797575	0.798208		0.935499	0.882482
	0.62622	1.67786			0.514741	0.149339		0.343296	0.290198		0.5712	0.47676		0.672946	0.567627		0.45852	0.733024		0.462263	0.711064		0.462926	0.766314		0.504319	0.803644		0.845324	0.916629		0.885429	0.898133		0.392381	0.87501		0.695117	0.825322
	2.42004	2.07032			0.13165	0.157788		0.217422	0.243688		0.30483	0.367299		0.504251	0.485245		0.52965	0.556647		0.699949	0.643947		0.829683	0.686665		0.732349	0.726742		0.85039	0.813085		0.821573	0.763112		0.863842	0.784836		0.8775	0.908008
	0.614624	1.90247			0.403154	0.965368		0.438252	0.527529		0.554364	0.562935		0.583102	0.956312		0.261732	0.696781		0.691393	0.956932		0.930483	0.718091		0.718826	0.73993		0.645311	0.85273		0.585307	0.779479		0.39073	0.84659		1.11646	0.774634
	2.73804	1.74316			0	0.230673		0	0.420379		0.41758	0.478645		0.475221	0.514004		0.678936	0.639103		0.792058	0.642607		0.828639	0.719799		0.855223	0.070364		0.910634	0.723311		0.90011	0.800443		0.931236	0.767831		0.923163	0.86465
	0.720826	4.27308			0.743608	0.575263		0.393792	0.669177		0.560373	0.574305		0.578297	0.523851		0.731524	0.843896		0.943242	0.8608		0.543914	0.55157		0.869976	0.572197		0.796082	0.799484		1.07787	0.758057		0.699989	0.700837		0.462249	0.716809
	0.321656	0.900878			0.508249	0.35721		0.707921	0.50832		0.622693	0.606427		0.669682	0.593997		1.24436	0.562657		0.782606	0.644549		0.590909	0.69791		0.347088	0.59862		0.692112	0.556407		1.06442	0.594896		0.609049	0.756662		0.951567	0.666853
	0.361938	1.38611			0.776731	0.059265		0.740443	0.062831		0.753302	0.359741		0.683002	0.376504		1.09791	0.503771		0.381657	0.648945		0.58658	0.808101		1.03529	0.760843		0.835283	0.792104		0.90019	0.84262		0.987663	0.910843		1.18399	0.917592
	4.5868	1.28357			0.178538	0.677071		0.288285	0.732927		0.419155	0.660281		0.51625	0.624452		0.619715	0.831587		0.66137	0.754855		0.655658	0.877114		0.829012	0.744756		0.749849	1.14069		0.790901	0.897999		0.850102	0.926692		0.90729	0.762261
	4.34326	0.992432			0.292089	0.181851		0.485566	0.279832		0.562659	0.486697		0.537747	0.447633		0.505863	0.636018		0.723156	0.630202		0.779502	0.634772		0.764279	0.833661		0.725975	0.890955		0.747305	0.820426		0.916024	0.918749		0.933531	0.949269
	1.58142	3.40026			0.504397	0.171716		0.735633	0.330953		0.798944	0.56393		0.688838	0.750911		0.838496	0.763217		0.524967	0.761072		0.740032	0.813688		0.658672	0.930358		0.700841	0.877541		0.692917	0.895701		0.869108	0.949984		0.837193	0.979694
	1.60645	6.17676			0.091648			0.245658			0.408059			0.572301			0.709631			0.75867			0.799053			0.829863			0.85853			0.826694			0.890777			0.933806
	1.3446				0.254237			0.36903			0.522576			0.355327			0.530448			0.460367			0.658107			0.55489			0.603829			0.573828			0.738242			0.524292
					0.140688			0.198742			0.342241			0.358629			0.63012			0.62987			0.846152			0.937708			0.973465			0.783572			0.854496			0.721351

## Sheet: Summary statistics
Panel B:		N	Mean	SEM	P values	statistical test
	WT	14	1.802	0.398263
	KO	13	2.175	0.446166	0.5219	unpaired two-tail student's t-test
Panel C:		N	Mean	SEM	P values	statistical test
	20ms_WT	15	0.3401	0.0617204
	20ms_KO	12	0.3489	0.0817237	0.9281	unpaired two-tail student's t-test
		N	Mean	SEM	P values	statistical test
	50ms_WT	15	0.4063	0.0560104
	50ms_KO	12	0.379	0.0600146	0.7342	unpaired two-tail student's t-test
		N	Mean	SEM	P values	statistical test
	100ms_WT	15	0.5403	0.0382012
	100ms_KO	12	0.5091	0.0346288	0.5448	unpaired two-tail student's t-test
		N	Mean	SEM	P values	statistical test
	150ms_WT	15	0.565	0.0311214
	150ms_KO	12	0.5684	0.0570997	0.9538	unpaired two-tail student's t-test
		N	Mean	SEM	P values	statistical test
	200ms_WT	15	0.6757	0.0656371
	200ms_KO	12	0.644	0.048758	0.7037	unpaired two-tail student's t-test
		N	Mean	SEM	P values	statistical test
	300ms_WT	15	0.6781	0.0435401
	300ms_KO	12	0.6822	0.0428899	0.9463	unpaired two-tail student's t-test
		N	Mean	SEM	P values	statistical test
	400ms_WT	15	0.7363	0.0392286
	400ms_KO	12	0.6976	0.0340485	0.4592	unpaired two-tail student's t-test
		N	Mean	SEM	P values	statistical test
	500ms_WT	15	0.7435	0.0465549
	500ms_KO	12	0.6775	0.068657	0.4007	unpaired two-tail student's t-test
		N	Mean	SEM	P values	statistical test
	750ms_WT	15	0.8082	0.032336
	750ms_KO	12	0.8054	0.046107	0.9586	unpaired two-tail student's t-test
		N	Mean	SEM	P values	statistical test
	1000ms_WT	15	0.8254	0.0389934
	1000ms_KO	12	0.8192	0.0346691	0.9057	unpaired two-tail student's t-test
		N	Mean	SEM	P values	statistical test
	1500ms_WT	15	0.7741	0.0485918
	1500ms_KO	12	0.832	0.0251033	0.3189	unpaired two-tail student's t-test
		N	Mean	SEM	P values	statistical test
	2000ms_WT	15	0.8521	0.0517893
	2000ms_KO	12	0.8337	0.0296887	0.7673	unpaired two-tail student's t-test
