# Supplementary material for: TRPM7 is critical for short-term synaptic depression by regulating synaptic vesicle endocytosis
Source: eLife. 2021 Sep 27;10:e66709. doi: 10.7554/eLife.66709 (PMC8516418; doi:10.7554/eLife.66709)
Supplement: Figure 3—figure supplement 6—source data 1. [file elife-66709-fig3-figsupp6-data1.xlsx]

## Sheet: Source data
	WT	KO
	0.192812	0.0594213
	0.268369	0.155639
	0.129162	0.274226
	0.225897	0.215754
	0.165343	0.118504
	0.111005	0.286006
	0.130125	0.124928
	0.0963564	0.135984
	0.107879	0.324797
	0.156325	0.216805
	0.237834	0.157647
	0.0626828	0.282903
	0.177367	0.074743
	0.11881	0.19503
	0.266486	0.0845621
	0.141456	0.0932264
	0.157842	0.111709
	0.265862	0.241393
	0.201172	0.193029
	0.156328	0.27083
	0.155599	0.151083
	0.119902	0.208738
	0.176471	0.167644
	0.186286	0.118206
	0.182604	0.145874
	0.259658	0.0788865
	0.223164	0.102387
	0.230292	0.178298
	0.198638	0.195809
	0.161591	0.153429
	0.248587	0.216425
	0.194393	0.301087
	0.188975	0.115411
	0.134011	0.165375
	0.236634	0.234003
	0.182575	0.258801
	0.189395	0.170386
	0.102352	0.126972
	0.0693916	0.105448
	0.102275	0.0398356
	0.217372	0.0571177
	0.224788	0.227933
	0.21241	0.144864
	0.229184	0.072133
	0.225331	0.0966001
	0.0650979	0.089486
	0.0782841	0.104786
	0.165827	0.223155
	0.182807	0.167779
	0.199347	0.108715
	0.145015	0.0923314
	0.308636	0.102791
	0.0756441	0.134686
	0.127928	0.240538
	0.241819	0.0899544
	0.10463	0.269857
	0.17458	0.303092
	0.196025	0.191532
	0.0441253	0.139265
	0.209829	0.328143
	0.223039	0.212087
	0.155266	0.0680428
	0.0616967	0.147284
	0.207664	0.395381
	0.201815	0.295437
	0.142184	0.324008
	0.134422	0.110152
	0.170386	0.106486
	0.236347	0.0823162
	0.093298	0.0957624
	0.124474	0.189532
	0.113812	0.16375
	0.0714442	0.0672555
	0.100318	0.270854
	0.0910079	0.223171
	0.112297	0.229676
	0.246761	0.0970965
	0.134914	0.246439
	0.0994846	0.086011
	0.248613	0.198125
	0.217754	0.158744
	0.218984	0.218504
	0.22279	0.167506
	0.309606	0.167671
	0.153635	0.171648
	0.325439	0.133741
	0.157772	0.142822
	0.315156	0.204566
	0.0865822	0.115485
	0.198112	0.219108
	0.12605	0.125735
	0.121527	0.108622
	0.23346	0.231946
	0.246422	0.188655
	0.206806	0.257703
	0.148506	0.0985185
	0.125166	0.107596
	0.0754667	0.303962
	0.15081	0.132467
	0.0521685	0.247681
	0.095793	0.0929596
	0.116071	0.180802
	0.125502	0.142177
	0.217444	0.108151
	0.12194	0.139893
	0.0785571	0.0721982
	0.229133	0.107162
	0.13672	0.0970324
	0.232892	0.120067
	0.163515	0.238825
	0.0672433	0.132969
	0.115097	0.140111
	0.131071	0.0863738
	0.301668	0.143791
	0.235858	0.184783
	0.112238	0.17753
	0.110062	0.122555
	0.23136	0.17612
	0.235769	0.135731
	0.0845971	0.135895
	0.185965	0.175624
	0.14673	0.152574
	0.265895	0.127095
	0.335803	0.239373
	0.219226	0.208602
	0.185996	0.0887423
	0.198465	0.1448
	0.177734	0.133121
	0.124127	0.0684912
	0.153909	0.203543
	0.0496937	0.199471
	0.312169	0.0521487
	0.240498	0.0904948
	0.266317	0.0903183
	0.186025	0.123334
	0.128496	0.120551
	0.206644	0.123657
	0.193925	0.0860519
	0.137946	0.115933
	0.169393	0.135173
	0.101892
	0.239028
	0.237498
	0.114225
	0.0483712
	0.169896
	0.205354
	0.123003
	0.131807

## Sheet: Summary statistics
		N	Mean	SEM	P values	statistical test
	WT	149	0.1705	0.00538866
	KO	140	0.1612	0.00592047	0.2428	unpaired two-tail student's t-test
