# Supplementary material for: TRPM7 is critical for short-term synaptic depression by regulating synaptic vesicle endocytosis
Source: eLife. 2021 Sep 27;10:e66709. doi: 10.7554/eLife.66709 (PMC8516418; doi:10.7554/eLife.66709)
Supplement: Figure 3—source data 1. [file elife-66709-fig3-data1.xlsx]

## Sheet: Source data
Panel B:	WT	KO		Panel D:	WT	KO		Panel F:	WT	KO
	34.6899	96.4218			17.2763	37.1475			8.5314	9.92546
	17.3872	69.2376			14.0272	29.881			2.9083	3.65876
	16.7889	46.8919			12.27	21.9967			2.35106	14.4415
	20.9972	36.2891			18.2261	29.1423			2.8035	6.26778
	15.9466	72.051			12.7507	48.7952			3.26444	8.68101
	22.8009	34.1594			12.4603	35.5605			3.34746	2.4637
	15.8194	39.5786			13.1286	46.6214			3.2677	11.8538
	72.2903	18.7413			19.4621	27.4407			6.70282	3.87729
	21.7495	42.4938			17.2068	23.7291			3.69024	2.61714
	23.7839	32.4018			12.1701	44.5887			7.53784	6.73864
	31.6539	18.0481			14.9293	23.2237			4.12307	2.62535
	21.5153	20.7333			18.9414	26.185			4.44135	2.57487
	33.3019	30.406			17.7704	23.4552			7.46642	2.86722
	16.9937	23.4009			12.6579	51.0836			7.15077	2.82012
	16.9951	32.6387			20.2709	41.5198			7.48369	2.71577
	21.5984	29.1716			23.6011	40.7157			7.37458	3.02783
	26.6528	17.7296			15.5531	27.8681			6.58441	2.71595
	37.1536	18.0054			14.0068	16.6553			3.8914	2.62052
	11.9798	62.7923			11.9535	30.7877			10.633	2.83531
	14.741	43.3085			25.1878	37.5089			3.70923	2.86522
	18.6921	78.6039			16.6761	25.9744			13.2135	12.2936
	27.8288	38.184			17.6615	35.1488			7.07629	4.09598
	24.5283	22.7579			21.557	35.7739			8.15707	4.05222
	39.6129	16.4854			16.3199	37.13			8.0564	6.27762
	42.0579	36.446			35.8002	23.5224			2.78104	2.97792
	49.4781	42.6135			14.5684	25.9426			7.35705	2.84989
	19.4891	51.2319			11.733	27.6972			6.62721	3.23509
	35.4341	31.5391			13.6818	19.929			6.67343	3.47445
	29.4061	41.5014			16.3496	17.1189			7.26786	2.87758
	24.9688	36.7322			11.7108	16.5033			3.70976	3.5026
	24.6445	32.9649			23.4878	15.9784			4.18279	3.71955
	32.6613	49.3098			17.0737	12.8566			7.65662	6.45711
	31.4778	23.4767			18.3738	24.1687			2.85605	3.81548
	21.4709	43.7814			14.689	18.6839			3.32116	2.81154
	32.4876	25.2939			13.1208	15.2979			2.77259	3.08693
	33.0341	46.3731			11.2195	20.5782			3.86518	6.27026
	28.6834	30.4923			12.409	37.1973			3.31366	4.99231
	30.1912	38.7241			15.6443	22.0144			2.91837	11.7599
	43.6482	37.6995			59.2873	18.5954			2.55954	6.40576
	19.7317	30.8792			16.2575	16.7299			2.93555	13.6268
	19.4345	38.3561			36.7847	31.4423			3.09194	10.4398
	20.9386	53.4262			24.7263	29.6571			2.9972	13.15
	15.5412	38.4852			39.7844	20.4987			3.08761	5.58544
	23.7956	74.0848			39.2633	51.4663			2.85583	1.88463
	15.3778	22.4636			33.6746	25.4289			6.2775	7.12248
	44.8382	23.6728			19.0337	14.6682			2.4056	5.48879
	16.0168	64.3611			15.8918	32.5042			7.40105	5.40848
	12.7522	34.4702			17.0761	29.1215			3.51368	12.8613
	9.85585	59.2513			18.0481	19.0414			2.57179	8.10596
	11.6966	29.0716			24.6306	30.9016			7.5155	7.83576
	23.2828	37.9801			18.1913	32.3327			12.7476	9.89225
	12.966	43.5348			13.298	27.8302			5.88313	6.54893
	12.6447	66.153			32.0626	23.5666			3.76894	12.9358
	11.8558	35.6133			21.1659	30.6638			8.99435	10.1025
	14.0223	33.5055			13.3101	26.4961			8.23427	5.42678
	18.4495	68.7478			16.8923	20.1114			13.5596	4.12324
	20.5316	35.1303			21.5497	15.0367			8.54303	10.5616
	11.6821	71.3518			21.7879	16.5126			8.71787	7.76903
	15.9056	28.0459			26.438	62.8747			7.7543	13.6157
	19.665	27.0392			23.8733	22.6215			5.5794	12.5318
	10.7225	31.7746			15.4228	54.11			7.33231	2.7278
	16.8202	12.6903			25.1623	33.7243			7.18799	2.96594
	26.1232	8.20812			30.8392	35.4681			3.27715	8.98819
	31.5175	19.6813			51.4714	34.8081			4.11757	9.63727
	33.6995	32.1939			24.7024	27.1654			6.14524	4.98161
	21.1716	12.2721			16.9793	23.5983			5.31717	6.16608
	22.7998	14.9048			17.5217	20.3307			3.85846	6.87866
	23.7927	40.5422			18.6227	45.7795			11.8547	4.8641
	20.9033	26.6076			26.2617	68.3083			4.48788	8.5523
	16.2777	32.6296			16.0663	23.7881			10.9814	7.96202
	15.773	26.8615			59.5944	36.1788			5.30054	6.19366
	9.71945	29.8976			38.5041	70.6328			7.38435	5.34799
	34.3802	34.6977			47.6243	36.1278			6.9108	3.75044
	27.8803	26.8924			20.636	48.0638			11.0041	8.78388
	56.3664	15.3038			30.9496	53.8085			5.93069	8.29964
	21.7323	31.4618			38.8135	26.8394			10.2504	2.50183
	30.0775	32.6895			22.7764	30.3999			11.1326	9.50951
	49.2764	22.0909			22.95	25.5722			6.85099	0.458658
	19.9131	40.1173			31.5179	28.9618			12.2844	2.82713
	11.0812	35.3849			28.7742	31.3356			6.4538	12.4418
	8.68917	84.9543			27.9596	33.3048			3.72178	7.95989
	15.9095	29.6326			26.0126	60.9409			14.8462	3.53149
	13.811	17.9766			36.5913	18.2439			7.4946	2.81056
	15.7012	48.8375			45.6667	26.8741			6.27124	2.68784
	17.0622	16.7573			16.3597	26.2629			7.11397	7.29033
	11.8826	10.8004			27.1893	20.5204			5.94503	3.4273
	15.715	19.9736			25.462	26.0675			9.38194	2.78211
	12.9051	15.5132			21.0655	19.3868			7.00277	5.87008
	13.4031	14.7087			29.0085	34.8675			8.29294	3.06822
	13.4186	13.1583			15.3861	25.4497			8.07622	0.911966
	11.4884	13.8504			22.2093	26.1406			7.20717	7.8662
	13.1798	21.4423			30.3534	33.3969			4.59585	4.04921
	10.8415	19.5106			27.6517	15.4989			5.69363	12.7622
	17.146	17.4762			36.9768	17.1414			6.1244	2.91452
	12.6666	17.7215			32.7306	33.3211			6.5477	4.23154
	15.4856	18.5325			23.1769	26.8872			6.50165	4.04504
	9.87887	20.8935			13.117	25.0363			5.50982	6.52061
	17.0894	20.3551			22.562	17.144			3.77531	6.41542
	17.3473	24.577			30.0945	51.0095			7.14654	8.55041
	15.2501	18.4453			26.833	33.8821			5.20505	8.13288
	13.4025	17.9075			19.3421	39.4949			11.1546	6.15712
	19.7821	12.6265			20.216	16.3621			3.61715
	16.5045	35.6397			42.3265	15.399			7.05122
	14.518	22.7425			31.6214	32.9881			3.84233
	17.8625	19.7211			32.1396	23.4566			4.67598
	13.417	37.3533			25.9552				5.94592
	19.1361	31.0423			22.9795				7.19546
	19.3657	22.8796			23.1849				4.49216
	30.9373	21.2824			28.9241				6.39513
	18.1066	30.774			25.8171				5.76024
	10.6651	16.6877			38.038				6.2319
	13.1044	22.4859			28.2036				3.60113
	16.5659	18.2738			24.3885				4.06464
	27.8853	32.2985			35.2178				6.75849
	45.4959	70.8135			14.0337				6.74039
	14.0734	29.8682			14.7017				7.06763
	26.8884	25.8703			25.1043				2.95207
	25.9122	32.9632			8.15674				3.73785
	16.0612	21.9221			15.481				2.67217
	20.26	23.6381			15.205				5.06283
	15.4195	26.9003			16.3874				2.6048
	32.2045	18.1467			12.4809
	25.3997	20.1259			11.8475
	25.053	24.7323			14.252
	24.2899	25.6169			26.8045
	45.3612	36.416			15.5388
	40.5393	17.4439			33.6932
	19.737
	21.7806
	28.183
	28.7111
	14.8817
	18.6742
	38.2645
	76.4441
	23.893
	19.9002
	36.521
	14.9936

## Sheet: Summary statistics
Panel D:		N	Mean	SEM	P values	statistical test
	WT	139	22.91	0.973827
	KO	127	32.54	1.48998	<0.0001	unpaired two-tail student's t-test
Panel D:		N	Mean	SEM	P values	statistical test
	WT	127	23.01	0.881337
	KO	105	29.98	1.17491	<0.0001	unpaired two-tail student's t-test
Panel F:		N	Mean	SEM	P values	statistical test
	WT	121	6.084	0.248458
	KO	101	6.079	0.344103	0.9899	unpaired two-tail student's t-test
