# Supplementary material for: TRPM7 is critical for short-term synaptic depression by regulating synaptic vesicle endocytosis
Source: eLife. 2021 Sep 27;10:e66709. doi: 10.7554/eLife.66709 (PMC8516418; doi:10.7554/eLife.66709)
Supplement: Figure 4—figure supplement 2—source data 1. [file elife-66709-fig4-figsupp2-data1.xlsx]

## Sheet: Source data
Panel B: (x10^6)	Mock	TRPM7WT	TRPM7KO
	1.37338	1.52344	5.8548
	1.1331	3.20456	4.03903
	0.765623	5.23317	1.45884
	1.83861	1.48976	4.47103
	1.18261	5.02215	10.2075
	1.52451	7.09981	3.20293
	1.37274	4.03461	1.27306
	1.16913	1.58832	1.57233
	1.61561	4.13613	5.8809
	1.58828	5.10252	2.64561

## Sheet: Summary statistics
Panel B:		N	Mean	SEM	One-way ANOVA	Tukey's multiple comparisons test (P value)
a	Mock	10	1.356	0.102225	F = 6.044	a vs. b	P = 0.0205
b	TRPM7WT	10	3.843	0.629012	P value = 0.0068	a vs. c	P = 0.0113
c	TRPM7KO	10	4.061	0.915944		b vs. c	P = 0.9658
