# Supplementary material for: TRPM7 is critical for short-term synaptic depression by regulating synaptic vesicle endocytosis
Source: eLife. 2021 Sep 27;10:e66709. doi: 10.7554/eLife.66709 (PMC8516418; doi:10.7554/eLife.66709)
Supplement: Figure 4—source data 1. [file elife-66709-fig4-data1.xlsx]

## Sheet: Source data
Panel B:	WT	LCF		Panel D:	WT	LCF		Panel E:	WT	LCF		Panel F:	WT	LCF		Panel G:	WT	LCF		Panel I:	WT	LCF
	2.44325	0.179545			3	15			0.9	0.41			137	51			1.41097	1.38748			18.8089	21.5102
	4.81085	0.432811			8	21			0.7	1.11			199	217			1.41097	1.43324			14.6744	25.4132
	5.58395	0.186717			0	3			1.09	0.7			222	140			1.41097	1.53015			11.147	44.4521
	0.799632	0.131999			0	0			0.59	0.34			104	96			1.45443	1.54719			36.6165	34.1831
	4.50405	0.134216			1	0			0.48	0.43			147	51			1.49394	1.57937			22.6933	17.8712
	3.91125	0.26534			0	3			0.98	0.44			172	87			1.51242	1.57937			16.5266	31.5421
	2.80631	0.291433			4	6			0.44	0.96			58	103			1.53015	1.59461			18.484	32.898
	9.2015	0.066589			0	16			0.66	0.32			174	36			1.53015	1.66369			47.5403	15.8423
	6.67528	0.128276			0	1			0.93	1.31			180	200			1.54719	1.67628			28.6528	14.588
	4.00823	0.16861			8	2			1.02	0.66			109	81			1.56358	1.70041			43.9191	18.1737
	5.22542	0.105489			4	7			0.69	0.29			79	83			1.59461	1.75546			14.335	16.3975
	0.621378	0.282491			31	1			1.17	0.97			233	168			1.65073	1.79497			50.3681	49.589
	3.0664	0.315328			10	2			0.92	0.94			135	191			1.66369	1.82241			47.6445	17.2494
	6.08363				3	0			0.81	0.55			77	123			1.67628	1.83118			31.0883	27.5761
	4.8543				1	16			0.59	0.97			101	87			1.83118	1.83118			26.3488	17.1447
	3.79937				0	5			1.53	0.38			257	63			1.85649	1.85649			17.1028	16.7204
					0	0			0.81	0.86			167	202			1.89564	1.86461			31.6081	11.5253
					1	10			0.57	1.15			88	214			1.9246	1.98954			20.161	38.2707
					0	0			0.35	1.65			67	453			1.93839	2.0187			22.3831	37.0401
					0	0			0.34	0.78			32	163			2.0187	2.0353			22.8251	24.6462
					0	4			0.36	0.67			52	132			2.05129	2.04603			17.1662	34.4197
					2	4			0.48	0.95			58	294			2.0816	2.05649			14.1069	29.2832
					1	3			1.33	0.78			309	113			2.08645	2.10534			13.6961	9.58045
					4	1			0.51	1.37			56	178			2.09125	2.12344			14.8211	32.1869
					5	0			0.75	1.55			195	428			2.11448	2.12785			29.944	33.2235
					0	0			1.55	1.51			197	371			2.15752	2.1534			34.0786	16.4265
					0	2			0.69	1.27			59	380			2.19291	2.18529			13.2084	10.6935
					4	4			0.42	1.58			35	289			2.24615	2.21857			15.3556	26.4537
					7	8			0.62	0.87			79	142			2.27209	2.39228			16.0104	23.4116
					0	6			0.94	0.47			129	74			2.27523	2.39228			32.9766	37.78
					5	5			1.99	0.95			537	162			2.29057	2.40867			30.0461	30.8391
					1	10			0.36	1.13			58	242			2.3497	2.47857			8.43176	34.4164
					0	25			0.43	0.66			56	96			2.37276	2.48052			18.9815	53.7176
					1	1			0.55	1.23			69	218			2.38263	2.56035			13.7453	39.6423
					2	3			0.88	0.3			182	38			2.41777	2.62637			14.9837	33.9827
					0	0			0.36	0.53			57	54			2.46263	2.67003			18.6052	22.9616
					1	6			1.55	0.69			157	87			2.46263	2.67254			24.1003	29.3075
					1	0			0.7	0.74			196	103			2.46465	2.67876			16.174	37.9804
					9	8			0.74	0.56			152	90			2.48439	2.7074			22.5013	31.4991
					15	8			1.4	1.05			200	97			2.52841	2.74921			17.394	31.9032
					4	4			0.5	0.71			65	120			2.61078	2.81616			14.6436	25.7556
					11	0			0.59	1.89			108	437			2.70508	2.8532			26.4596	14.9112
					1	3			0.55	0.71			76	126			2.9246	2.89788			11.1039	13.3752
					3	1			1.54	0.54			191	146			3.20446	2.90746			15.7488	12.5637
					14	3				0.39				62				2.95503			14.2191	26.6443
					15	0				0.58				70				2.97607			19.1146	40.3114
					10	0				0.77				114				2.98286			9.61392	47.8354
					2	3				1.37				193				3.0879			15.2759	44.2552
					0	0				0.48				70				3.17163			18.4105	65.331
					16	6				0.79				119				3.21643			16.0013	58.5052
					0	1				0.72				111				3.22912			19.2782	81.914
					1	6				0.82				189				3.2367			18.6771	48.2064
					5	29				1.7				331				3.28694			16.1269	20.0896
					4	3															27.2245	36.5638
					0	8															13.8454	34.3516
					1	26															11.3567	63.4928
					5	14															9.84488	24.32
					12	8															19.4594	36.9177
					0	13															17.9744	19.88
					0	16															13.2623	40.1485
					1	18															28.3516	28.6785
					2	0															21.7849	65.581
					21	2															46.1661	80.6896
					1	15															17.2015	39.5098
					10	4															34.1393	20.4588
					15	18															24.7697	59.4138
					2	7															61.9946	31.5868
					5	0															5.87694	41.9598
					6	7															22.9836	85.3962
					23	9																67.2155
					0	0																31.9504
					4	3																45.6502
					2	13																46.5139
					19	0																27.8916
					0	1																60.9822
					6	5																40.0793
					10	2																64.2573
					12	0																34.3029
					10	11																18.3319
					17	15																20.8502
					3	11																46.6057
					1	1																38.8826
					1	9																35.8628
					1	0																72.2617
					12	4																31.2994
					6	3																28.6514
					4	8																59.8812
					2	7
					14	2
					5	0
					7	8
					11	1
					0	2
					2	2
					0	0
					19	1
					14	0
					11	26
					2	22
					12	10
					8	1
					1	1
					2	0
					8	4
					11	10
					3	1
					0	15
					0	8
					3	4
					7	11
					1	5
					13	1
					16	2
					8	2
					12	27
					0	1
					19	17
					4	7
					3	9
					15	2
					0	27
					5	9
					5	6
					5	2
					5	2
					2	4
					3	1
					9	0
					3
					0
					15
					28
					1
					3
					1
					0
					0
					4
					13
					0
					1

## Sheet: Summary statistics
Panel B:		N	Mean	SEM	P values	statistical test
	WT	16	4.275	0.555476
	LCF	13	0.2068	0.0298998	<0.0001	unpaired two-tail student's t-test
Panel D:		N	Mean	SEM	P values	statistical test
	WT	141	5.433	0.529469
	LCF	128	6.063	0.614854	0.4343	unpaired two-tail student's t-test
Panel E:		N	Mean	SEM	P values	statistical test
	WT	44	0.8036	0.0607703
	LCF	53	0.8594	0.0557781	0.4962	unpaired two-tail student's t-test
Panel F:		N	Mean	SEM	P values	statistical test
	WT	44	136.6	13.9128
	LCF	53	160.1	14.745	0.2515	unpaired two-tail student's t-test
Panel G:		N	Mean	SEM	P values	statistical test
	WT	44	2.049	0.0676007
	LCF	53	2.301	0.0773755	0.0171	unpaired two-tail student's t-test
Panel I:		N	Mean	SEM	P values	statistical test
	WT	69	22.03	1.33295
	LCF	87	35.55	1.8589	<0.0001	unpaired two-tail student's t-test
