# Supplementary material for: TRPM7 is critical for short-term synaptic depression by regulating synaptic vesicle endocytosis
Source: eLife. 2021 Sep 27;10:e66709. doi: 10.7554/eLife.66709 (PMC8516418; doi:10.7554/eLife.66709)
Supplement: Figure 5—figure supplement 1—source data 1. [file elife-66709-fig5-figsupp1-data1.xlsx]

## Sheet: Source data
	WT	KO
	0.417159	0.475174
	0.396853	0.42127
	0.490741	0.575563
	0.682063	0.464732
	0.409338	0.597974
	0.625447	0.460534
	0.707881	0.500441
	0.419933	0.521406
	0.461592	0.760994
	0.389361	0.438419
	0.451472	0.548375
	0.598099	0.408435
	0.454043	0.764534
	0.453614	0.463794
	0.455929	0.473255
	0.414038	0.465508

## Sheet: Summary statistics
		N	Mean	SEM	P values	statistical test
	WT	16	0.4892	0.0268119
	KO	16	0.5213	0.0278064	0.3982	unpaired two-tail student's t-test
