# Supplementary material for: TRPM7 is critical for short-term synaptic depression by regulating synaptic vesicle endocytosis
Source: eLife. 2021 Sep 27;10:e66709. doi: 10.7554/eLife.66709 (PMC8516418; doi:10.7554/eLife.66709)
Supplement: Figure 5—figure supplement 3—source data 1. [file elife-66709-fig5-figsupp3-data1.xlsx]

## Sheet: Source data
	WT	KO
	1.0296	2.3886
	0.85558	1.3875
	0.53007	0.67576
	0.83173	0.88512
	0.52465	0.8591
	0.77646	0.62777
	0.82891	1.504
	0.50536	0.91759
	0.7681	0.59593
	0.82618	0.59943
	1.7235

## Sheet: Summary statistics
		N	Mean	SEM	P values	statistical test
	WT	11	0.8364	0.106475
	KO	10	1.044	0.189874	0.3163	unpaired two-tail student's t-test
