# Supplementary material for: TRPM7 is critical for short-term synaptic depression by regulating synaptic vesicle endocytosis
Source: eLife. 2021 Sep 27;10:e66709. doi: 10.7554/eLife.66709 (PMC8516418; doi:10.7554/eLife.66709)
Supplement: Figure 5—source data 1. [file elife-66709-fig5-data1.xlsx]

## Sheet: Source data
Panel B:	WT2Ca	KO2Ca	WT0Ca	KO0Ca		Panel D:	WT	KO		Panel F:	WT	KO
	34.6899	96.4218	61.54	36.7272			4.10526	2.01115			0.107036	0.154393
	17.3872	69.2376	68.8823	50.2075			4.04793	2.29897			0.168858	0.189068
	16.7889	46.8919	69.0975	21.6503			2.61555	1.46718			0.133383	0.190499
	20.9972	36.2891	52.1406	54.1194			1.90077	1.79575			0.185897	0.229038
	15.9466	72.051	30.9599	30.1095			1.7741	1.97516			0.15253	0.172232
	22.8009	34.1594	54.2465	33.6823			3.64119	3.13246			0.148852	0.161376
	15.8194	39.5786	48.4092	66.2061			2.36548	2.15083			0.225738	0.151346
	72.2903	18.7413	71.0676	42.1087			3.20261	2.16919			0.142971	0.14001
	21.7495	42.4938	27.1095	47.2919			3.53519	1.88185			0.125507	0.220984
	23.7839	32.4018	40.552	23.6147			4.54274	1.71104			0.117796	0.146083
	31.6539	18.0481	73.0559	55.5723			2.44638				0.143939
	21.5153	20.7333	62.8874	56.8296
	33.3019	30.406	20.936	35.9139
	16.9937	23.4009	72.3628	14.5502
	16.9951	32.6387	22.3097	48.0367
	21.5984	29.1716	21.95	15.7338
	26.6528	17.7296	28.7502	67.1997
	37.1536	62.7923	23.1768	24.985
	11.9798	43.3085	18.5722	17.8182
	14.741	78.6039	23.4711	21.3472
	18.6921	38.184	27.6165	17.1209
	27.8288	22.7579	51.0407	27.1879
	24.5283	36.446	28.4705	21.8581
	39.6129	42.6135	14.2433	32.8992
	42.0579	51.2319	50.3168	36.8425
	49.4781	31.5391	70.3724	19.5067
	19.4891	36.7322	26.3892	25.7757
	35.4341	49.3098	17.046	29.6529
	29.4061	23.4767	32.6863	35.3688
	24.9688	25.2939	28.8674	49.6303
	24.6445	46.3731	38.0823	18.7707
	32.6613	30.4923	43.0102	32.2477
	31.4778	38.7241	21.8808	87.434
	21.4709	37.6995	30.7513	26.8661
	33.0341	30.8792	10.8767	13.3526
	28.6834	38.3561	64.4769	39.4845
	30.1912	53.4262	11.1993	24.336
	43.6482	38.4852	12.9679	31.4015
	19.7317	74.0848	30.0321	54.4063
	19.4345	22.4636	23.9969	17.634
	20.9386	23.6728	12.3294	17.5571
	15.5412	64.3611	21.2414	36.3163
	23.7956	34.4702	23.1262	40.5987
	15.3778	59.2513	40.991	33.8964
	16.0168	29.0716	28.4204	20.0507
	12.7522	37.9801	24.9287	31.0159
	9.85585	43.5348	12.7929	23.2345
	11.6966	66.153	19.784	39.2938
	23.2828	35.6133	12.3833	17.8394
	12.966	33.5055	38.6346	22.2875
	12.6447	68.7478	25.3314	19.0084
	11.8558	35.1303	39.5162	34.297
	14.0223	71.3518	29.211	69.0719
	18.4495	28.0459	28.9334	22.6029
	20.5316	27.0392	28.6835	40.9221
	11.6821	31.7746	70.879	22.3266
	15.9056	12.6903	22.4943	33.5286
	10.7225	19.6813	43.2944	34.0436
	16.8202	32.1939	25.0607	35.5192
	26.1232	12.2721	56.8364	34.5781
	31.5175	14.9048	44.6624	25.3569
	33.6995	40.5422	28.3432	11.1345
	21.1716	26.6076	29.0667	26.5834
	22.7998	26.8615	56.2624	9.74804
	23.7927	29.8976	42.3109	74.1263
	20.9033	34.6977	48.1797	29.9096
	16.2777	15.3038	44.9481	19.2483
	15.773	31.4618	28.3442
	9.71945	32.6895
	27.8803	22.0909
	56.3664	40.1173
	21.7323	84.9543
	30.0775	29.6326
	49.2764	17.9766
	19.9131	48.8375
	11.0812	16.7573
	8.68917	10.8004
	15.9095	19.9736
	13.811	15.5132
	15.7012	14.7087
	17.0622	13.1583
	11.8826	13.8504
	15.715	21.4423
	12.9051	19.5106
	13.4031	17.4762
	13.4186	17.7215
	11.4884	18.5325
	13.1798	20.8935
	10.8415	20.3551
	17.146	24.577
	12.6666	18.4453
	15.4856	17.9075
	9.87887	35.6397
	17.0894	22.7425
	17.3473	19.7211
	15.2501	37.3533
	13.4025	31.0423
	19.7821	22.8796
	16.5045	21.2824
	14.518	30.774
	17.8625	16.6877
	13.417	22.4859
	19.1361	18.2738
	19.3657	32.2985
	18.1066	70.8135
	10.6651	29.8682
	13.1044	25.8703
	16.5659	32.9632
	27.8853	21.9221
	14.0734	23.6381
	26.8884	26.9003
	25.9122	18.1467
	16.0612	20.1259
	20.26	24.7323
	15.4195	25.6169
	32.2045	36.416
	25.3997
	25.053
	24.2899
	45.3612
	40.5393
	19.737
	21.7806
	28.183
	28.7111
	14.8817
	18.6742
	23.893
	19.9002
	36.521
	14.9936

## Sheet: Summary statistics
Panel B:		N	Mean	SEM	One-way ANOVA	Tukey's multiple comparisons test (P value)
a	WT 2Ca2+	131	21.85	0.0392258	F = 19.39	a vs. b	P < 0.0001
b	KO 2Ca2+	116	33.16	0.0739504	P value < 0.0001	a vs. c	P < 0.0001
c	WT 0Ca2+	68	36.07	0.132524		a vs. d	P < 0.0001
d	KO 0Ca2+	67	33.28	0.121708		b vs. c	p = 0.582
						b vs. d	p > 0.9999
						c vs. d	p = 0.7005
Panel D:		N	Mean	SEM	P values	statistical test
	WT	11	3.107	0.0471181
	KO	10	2.059	0.0249265	0.0048	unpaired two-tail student's t-test
Panel F:		N	Mean	SEM	P values	statistical test
	WT	11	0.1502	0.00167577
	KO	10	0.1755	0.0017281	0.0901	unpaired two-tail student's t-test
