# Supplementary material for: TRPM7 is critical for short-term synaptic depression by regulating synaptic vesicle endocytosis
Source: eLife. 2021 Sep 27;10:e66709. doi: 10.7554/eLife.66709 (PMC8516418; doi:10.7554/eLife.66709)
Supplement: Figure 6—source data 1. [file elife-66709-fig6-data1.xlsx]

## Sheet: Source data
Panel B insert:	WT	KO		Panel E insert:	WT	KO
	0.201126	0.024409			0.204288	0.195761
	0.242855	0.060802			0.21079	0.156228
	0.218714	0.127174			0.202807	0.191601
	0.167768	0.072347			0.24499	0.12084
	0.22572	0.125184			0.32464	0.247118
	0.205729	0.292402			0.330538	0.216154
	0.310415	0.14955			0.201268	0.171375
	0.352372	0.051355			0.289098	0.076855
	0.382463				0.134729	0.114066
	0.272752				0.099772	0.069049
					0.153086	0.11707
					0.215158	0.088338
					0.180181	0.101271
					0.221432	0.093223
					0.173766	0.099233
					0.1691	0.157537
					0.235843	0.140328
					0.25342	0.081265
					0.129514	0.055107
					0.225101	0.173552
					0.171421

## Sheet: Summary statistics
Panel B insert:		N	Mean	SEM	P values	statistical test
	WT	10	0.258	0.0233824
	KO	8	0.1129	0.0319106	0.0011	unpaired two-tail student's t-test
Panel E insert:		N	Mean	SEM	P values	statistical test
	WT	21	0.2081	0.01333
	KO	20	0.1333	0.0122408	0.0001	unpaired two-tail student's t-test
